# Supplementary material for: Iron-catalyzed decarboxylative alkenylation of cycloalkanes with arylvinyl carboxylic acids via a radical process
Source: PubMed Central journal article supplement (PMC3778410; doi:10.3762/bjoc.9.197), 2013-08-21
Supplement: Beilstein_J_Org_Chem-09-1718-s001.pdf [file Beilstein_J_Org_Chem-09-1718-s001.pdf]

**Supporting Information**  
**for**  
**Iron-catalyzed decarboxylative alkenylation of**  
**cycloalkanes with arylvinyl carboxylic acids via a**  
**radical process**

Jiancan Zhao<sup>1</sup>, Hong Fang<sup>1</sup>, Jianlin Han\*<sup>1,2</sup> and Yi Pan\*<sup>1</sup>

Address: <sup>1</sup>School of Chemistry and Chemical Engineering, State of Key Laboratory of Coordination, Nanjing University, Nanjing, 210093, China and <sup>2</sup>Institute for Chemistry & BioMedical Sciences, Nanjing University, Nanjing, 210093, China

Email: Jianlin Han\* - hanjl@nju.edu.cn; Yi Pan\* - yipan@nju.edu.cn

\*Corresponding author

**Experimental details and spectral data**

**Index**

|                                                                                     |     |
|-------------------------------------------------------------------------------------|-----|
| 1. Experimental Section .....                                                       | S2  |
| General Information .....                                                           | S2  |
| General Procedure.....                                                              | S2  |
| 2. Characterization data for compounds <b>3a–p</b> and <b>4a–f</b> .....            | S3  |
| 3. <sup>1</sup> H and <sup>13</sup> C NMR spectra <b>3a–p</b> and <b>4a–f</b> ..... | S9  |
| 4. References.....                                                                  | S31 |

## 1. Experimental Section

**General Information:** All reactions were carried out under a nitrogen atmosphere. Column chromatography was carried out on silica gel (300–400 mesh). Analytical thin-layer chromatography (TLC) was performed on glass plates of Silica Gel GF-254 with detection by UV light. Standard techniques for synthesis under inert gas atmosphere by using gasbag and Schlenk glassware equipped with an 8 mm PTFE vacuum stop-cock (Synthware) were employed. All starting materials and reagents were commercially available.  $^1\text{H}$  and  $^{13}\text{C}$  NMR spectra were recorded on a Bruker AVANCE400M spectrometer. The chemical shift references were as follows: ( $^1\text{H}$ )  $\text{CDCl}_3$ , 7.26 ppm ( $\text{CHCl}_3$ ); ( $^{13}\text{C}$ )  $\text{CDCl}_3$ , 77.00 ppm ( $\text{CDCl}_3$ ). HRMS spectra were carried out at Micromass GCT (TOF MS  $\text{EI}^+$ ). Melting points were determined on a Melt-Temp apparatus (X-4) from Beijing Fukai Electro-optic Instrument Plant and are uncorrected.

**General Procedure:** To a Schlenk tube equipped with a magnetic stir bar were added  $\text{Fe}(\text{acac})_3$  (21.2 mg, 0.06 mmol) and cinnamic acid (0.3 mmol) under a nitrogen atmosphere. Cycloalkane (2.0 mL, 15–25 mmol) and DTBP (di-*tert*-butyl peroxide, 0.6 mmol, 113  $\mu\text{L}$ ) were added under nitrogen and the resulting reaction mixture was kept stirring at 120  $^\circ\text{C}$  for 24 h. After cooling to room temperature and removal of volatiles the products were isolated by flash column chromatography (PE).

Products **3a**, **3e**, **3h**, **3j**, **3k**, **3p**, **4a**, **4c**, **4e**, **4f**, **3b**, **3l**, **3d**, **3n** and **4b**, are known compounds.  $^1\text{H}$  and  $^{13}\text{C}$  NMR spectra of these compounds have been confirmed to be identical to those of known samples (**3a**, **3e**, **3h**, **3j**, **3k**, **3p**, **4a**, **4c**, **4e** and **4f**) [1], (**3b** and **3l**) [2], **3d** [3], **3n** [4], **4b** [5]).

## 2. Characterization data for 3a–p and 4a–f.

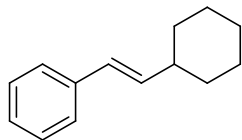

**(E)-1-(2-Cyclohexylvinyl)benzene(3a, known compound):** Colorless oil,  $^1\text{H}$  NMR (400 MHz,  $\text{CDCl}_3$ )  $\delta$  7.33–7.22 (m, 4H), 7.16–7.12 (m, 1H), 6.32 (d,  $J = 16.1$  Hz, 1H), 6.15 (dd,  $J = 16.0, 6.9$  Hz, 1H), 2.18–2.00 (m, 1H), 1.86–1.59 (m, 5H), 1.40–1.07 (m, 5H).  $^{13}\text{C}$  NMR (100 MHz,  $\text{CDCl}_3$ )  $\delta$  138.02, 136.70, 128.38, 127.26, 126.66, 125.91, 41.12, 32.93, 26.16, 26.03.

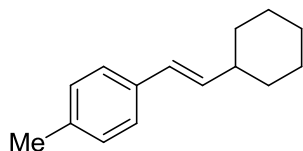

**(E)-1-(2-Cyclohexylvinyl)-4-methylbenzene(3b, known compound):** Colorless oil,  $^1\text{H}$  NMR (400 MHz,  $\text{CDCl}_3$ )  $\delta$  7.22 (d,  $J = 8.1$  Hz, 2H), 7.06 (d,  $J = 8.0$  Hz, 2H), 6.29 (d,  $J = 16.0$  Hz, 1H), 6.10 (dd,  $J = 16.0, 6.9$  Hz, 1H), 2.29 (s, 3H), 2.13–2.05 (m, 1H), 1.84–1.63 (m, 5H), 1.35–1.12 (m, 5H).  $^{13}\text{C}$  NMR (100 MHz,  $\text{CDCl}_3$ )  $\delta$  136.29, 135.73, 135.26, 129.09, 127.06, 125.81, 41.11, 33.01, 26.19, 26.06, 21.06.

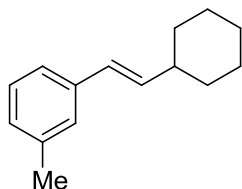

**(E)-1-(2-Cyclohexylvinyl)-3-methylbenzene(3c):** Colorless oil,  $^1\text{H}$  NMR (400 MHz,  $\text{CDCl}_3$ )  $\delta$  7.20–7.06 (m, 3H), 6.97–6.95 (m, 1H), 6.29 (d,  $J = 16.0$  Hz, 1H), 6.13 (dd,  $J = 16.0, 6.9$  Hz, 1H), 2.29 (s, 3H), 2.18–2.03 (m, 1H), 1.86–1.60 (m, 5H), 1.40–1.08 (m, 5H).  $^{13}\text{C}$  NMR (100 MHz,  $\text{CDCl}_3$ )  $\delta$  137.96, 137.79, 136.47, 128.29, 127.46, 127.33, 126.61, 123.11, 41.14, 32.97, 26.17, 26.04, 21.33. HRMS (TOF MS  $\text{EI}^+$ )  $m/z$  calcd for  $[\text{C}_{15}\text{H}_{20}]$  200.1565, found 200.1553.

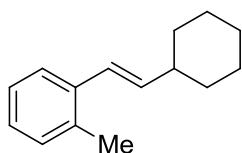

**(E)-1-(2-Cyclohexylvinyl)-2-methylbenzene(3d, known compound):** Colorless oil,  $^1\text{H}$  NMR (400 MHz,  $\text{CDCl}_3$ )  $\delta$  7.63 (d,  $J = 7.0$  Hz, 1H), 7.39–7.29 (m, 3H), 6.77 (d,  $J = 15.8$  Hz, 1H), 6.26 (dd,  $J = 15.8, 7.0$  Hz, 1H), 2.54 (s, 3H), 2.44–2.30 (m, 1H), 2.11–1.85 (m, 5H), 1.65–1.34 (m, 5H).  $^{13}\text{C}$  NMR (100 MHz,  $\text{CDCl}_3$ )  $\delta$  138.10, 137.10, 134.81, 130.05, 126.63, 125.92, 125.34, 125.09,

41.43, 33.08, 26.18, 26.05, 19.74.

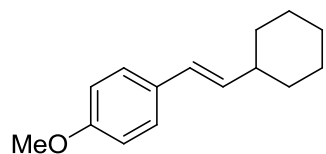

**(E)-1-(2-Cyclohexylvinyl)-4-methoxybenzene(3e, known compound):** Colorless oil,  $^1\text{H}$  NMR (400 MHz,  $\text{CDCl}_3$ )  $\delta$  7.17 (d,  $J = 8.7$  Hz, 1H), 6.72 (d,  $J = 8.7$  Hz, 1H), 6.19 (d,  $J = 16.0$  Hz, 1H), 5.94 (dd,  $J = 16.0, 6.9$  Hz, 1H), 3.67 (s, 3H), 2.04-1.96 (m, 1H), 1.76-1.53 (m, 5H), 1.25-1.04 (m, 5H).  $^{13}\text{C}$  NMR (100 MHz,  $\text{CDCl}_3$ )  $\delta$  158.57, 134.65, 130.84, 126.94, 126.55, 113.83, 55.15, 41.07, 33.06, 26.17, 26.06.

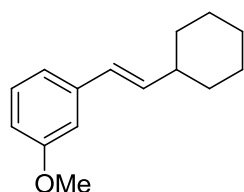

**(E)-1-(2-Cyclohexylvinyl)-3-methoxybenzene(3f):** Colorless oil,  $^1\text{H}$  NMR (400 MHz,  $\text{CDCl}_3$ )  $\delta$  7.18 (t,  $J = 7.9$  Hz, 1H), 6.96-6.86 (m, 2H), 6.72 (dd,  $J = 8.1, 2.1$  Hz, 1H), 6.30 (d,  $J = 16.0$  Hz, 1H), 6.16 (dd,  $J = 16.0, 6.8$  Hz, 1H), 3.78 (s, 3H), 2.12-2.06 (m, 1H), 1.85-1.63 (m, 5H), 1.34-1.14 (m, 5H).  $^{13}\text{C}$  NMR (100 MHz,  $\text{CDCl}_3$ )  $\delta$  159.76, 139.51, 137.07, 129.33, 127.13, 118.60, 112.35, 111.22, 55.07, 41.08, 32.89, 26.14, 26.00. HRMS (TOF MS  $\text{EI}^+$ )  $m/z$  calcd for  $[\text{C}_{15}\text{H}_{20}\text{O}]$  216.1514, found 216.1510.

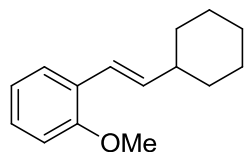

**(E)-1-(2-Cyclohexylvinyl)-2-methoxybenzene(3g):** Colorless oil,  $^1\text{H}$  NMR (400 MHz,  $\text{CDCl}_3$ )  $\delta$  7.41 (dd,  $J = 7.6, 1.1$  Hz, 1H), 7.14 (ddd,  $J = 8.8, 7.7, 1.1$  Hz, 1H), 6.87 (t,  $J = 7.4$  Hz, 1H), 6.80 (d,  $J = 8.2$  Hz, 1H), 6.69 (d,  $J = 16.1$  Hz, 1H), 6.14 (dd,  $J = 16.1, 7.0$  Hz, 1H), 3.78 (s, 3H), 2.23-2.05 (m, 1H), 1.88-1.61 (m, 5H), 1.38-1.11 (m, 5H).  $^{13}\text{C}$  NMR (100 MHz,  $\text{CDCl}_3$ )  $\delta$  156.27, 137.27, 127.66, 127.04, 126.12, 121.72, 120.54, 110.70, 55.31, 41.53, 33.04, 26.17, 26.05. HRMS (TOF MS  $\text{EI}^+$ )  $m/z$  calcd for  $[\text{C}_{15}\text{H}_{20}\text{O}]$  216.1514, found 216.1505.

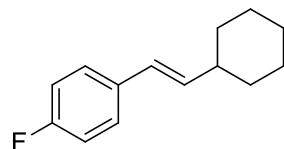

**(E)-1-(2-Cyclohexylvinyl)-4-fluorobenzene(3h, known compound):** White solid, mp 34-35 °C,  $^1\text{H}$  NMR (400 MHz,  $\text{CDCl}_3$ )  $\delta$  7.50 (d,  $J = 8.2$  Hz, 2H), 7.38 (d,  $J = 8.2$  Hz, 2H), 6.34 (d,  $J = 16.1$  Hz, 1H), 6.25 (dd,  $J = 16.0, 6.6$  Hz, 1H), 2.17-2.09 (m, 1H), 1.87-1.64 (m, 5H), 1.33-1.16 (m, 5H).  $^{13}\text{C}$  NMR (100 MHz,  $\text{CDCl}_3$ )  $\delta$  141.64 (d,  $J = 1.2$  Hz), 139.56, 128.61 (d,  $J = 32.3$  Hz), 126.18, 126.05, 125.36 (q,  $J = 3.9$  Hz), 41.23, 32.76, 26.12, 25.99.

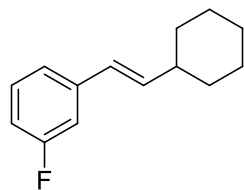

**(E)-1-(2-Cyclohexylvinyl)-3-fluorobenzene(3i):** Colorless oil,  $^1\text{H}$  NMR (400 MHz,  $\text{CDCl}_3$ )  $\delta$  7.20 (td,  $J = 7.9, 6.1$  Hz, 1H), 7.04 (ddd,  $J = 10.4, 8.1, 4.8$  Hz, 2H), 6.88–6.82 (m, 1H), 6.29 (d,  $J = 16.0$  Hz, 1H), 6.16 (dd,  $J = 15.9, 6.8$  Hz, 1H), 2.14–2.06 (m, 1H), 1.87–1.62 (m, 5H), 1.35–1.11 (m, 5H).  $^{13}\text{C}$  NMR (100 MHz,  $\text{CDCl}_3$ )  $\delta$  163.15 (d,  $J = 244.7$  Hz), 140.50 (d,  $J = 7.7$  Hz), 138.17, 129.77 (d,  $J = 8.5$  Hz), 126.31 (d,  $J = 2.5$  Hz), 121.82 (d,  $J = 2.6$  Hz), 113.42 (d,  $J = 21.4$  Hz), 112.31 (d,  $J = 21.7$  Hz), 41.08, 32.81, 26.12, 25.99. HRMS (TOF MS  $\text{EI}^+$ )  $m/z$  calcd for  $[\text{C}_{14}\text{H}_{17}\text{F}]$  204.1314, found 204.1320.

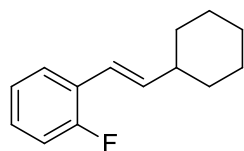

**(E)-1-(2-Cyclohexylvinyl)-2-fluorobenzene(3j, known compound):** Colorless oil,  $^1\text{H}$  NMR (400 MHz,  $\text{CDCl}_3$ )  $\delta$  7.42–7.38 (m, 1H), 7.16–6.93 (m, 3H), 6.50 (d,  $J = 16.2$  Hz, 1H), 6.22 (dd,  $J = 16.1, 7.0$  Hz, 1H), 2.16–2.09 (m, 1H), 1.87–1.61 (m, 5H), 1.39–1.10 (m, 5H).  $^{13}\text{C}$  NMR (100 MHz,  $\text{CDCl}_3$ )  $\delta$  160.00 (d,  $J = 248.0$  Hz), 139.26 (d,  $J = 4.1$  Hz), 127.83 (d,  $J = 8.3$  Hz), 126.85 (d,  $J = 4.0$  Hz), 125.76 (d,  $J = 12.3$  Hz), 123.88 (d,  $J = 3.5$  Hz), 119.61 (d,  $J = 3.9$  Hz), 115.50 (d,  $J = 22.3$  Hz), 41.52, 32.84, 26.14, 26.00.

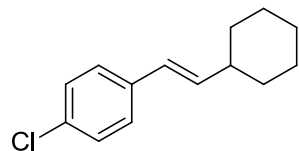

**(E)-1-Chloro-4-(2-cyclohexylvinyl)benzene(3k, known compound):** Colorless oil,  $^1\text{H}$  NMR (400 MHz,  $\text{CDCl}_3$ )  $\delta$  7.25–7.17 (m, 4H), 6.27 (d,  $J = 16.0$ , 1H), 6.13 (dd,  $J = 16.0, 6.8$  Hz, 1H), 2.14–2.06 (m, 1H), 1.80–1.65 (m, 5H), 1.32–1.14 (m, 5H).  $^{13}\text{C}$  NMR (100 MHz,  $\text{CDCl}_3$ )  $\delta$  137.46, 136.54, 132.20, 128.50, 127.11, 126.09, 41.10, 32.84, 26.12, 25.99.

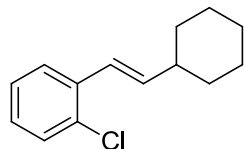

**(E)-1-Chloro-2-(2-cyclohexylvinyl)benzene(3l, known compound):** Colorless oil,  $^1\text{H}$  NMR (400 MHz,  $\text{CDCl}_3$ )  $\delta$  7.47 (dd,  $J = 7.7, 1.4$  Hz, 1H), 7.29 (dd,  $J = 7.9, 1.1$  Hz, 1H), 7.17–7.04 (m, 2H), 6.72 (d,  $J = 15.9$  Hz, 1H), 6.13 (dd,  $J = 15.9, 7.0$  Hz, 1H), 2.18–2.13 (m, 1H), 1.87–1.61 (m, 5H), 1.38–1.10 (m, 5H).  $^{13}\text{C}$  NMR (100 MHz,  $\text{CDCl}_3$ )  $\delta$  139.56, 136.05, 132.66, 129.51, 127.68, 126.62, 126.46, 123.62, 41.31, 32.83, 26.13, 25.97.

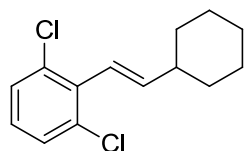

**(E)-1,3-Dichloro-2-(2-cyclohexylvinyl)benzene(3m):** Colorless oil,  $^1\text{H}$  NMR (400 MHz,  $\text{CDCl}_3$ )  $\delta$  7.25 (d,  $J = 8.0$  Hz, 2H), 7.00 (t,  $J = 8.0$  Hz, 1H), 6.28 (d,  $J = 16.4$  Hz, 1H), 6.14 (dd,  $J = 16.3$ , 6.7 Hz, 1H), 2.24–2.16 (m, 1H), 1.89–1.64 (m, 5H), 1.40–1.17 (m, 5H).  $^{13}\text{C}$  NMR (100 MHz,  $\text{CDCl}_3$ )  $\delta$  145.16, 135.49, 134.34, 128.23, 127.38, 120.98, 41.52, 32.51, 26.17, 25.89. HRMS (TOF MS  $\text{EI}^+$ )  $m/z$  calcd for  $[\text{C}_{14}\text{H}_{16}\text{Cl}_2]$  254.0629, found 254.0625.

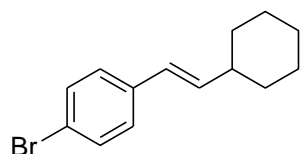

**(E)-1-Bromo-4-(2-cyclohexylvinyl)benzene (3n, known compound):** White solid, mp 39–40 °C,  $^1\text{H}$  NMR (400 MHz,  $\text{CDCl}_3$ )  $\delta$  7.36 (d,  $J = 8.5$  Hz, 2H), 7.16 (d,  $J = 8.4$  Hz, 2H), 6.25 (d,  $J = 16.1$  Hz, 1H), 6.13 (dd,  $J = 16.0$ , 6.7 Hz, 1H), 2.13–2.05 (m, 1H), 1.87–1.54 (m, 5H), 1.38–1.04 (m, 5H).  $^{13}\text{C}$  NMR (100 MHz,  $\text{CDCl}_3$ )  $\delta$  137.54, 136.95, 131.41, 127.44, 126.14, 120.28, 41.08, 32.79, 26.11, 25.98.

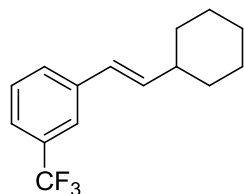

**(E)-1-(2-Cyclohexylvinyl)-3-(trifluoromethyl)benzene(3o):** Colorless oil,  $^1\text{H}$  NMR (400 MHz,  $\text{CDCl}_3$ )  $\delta$  7.57 (s, 1H), 7.46–7.30 (m, 3H), 6.34 (d,  $J = 16.1$  Hz, 1H), 6.22 (dd,  $J = 16.0$ , 6.7 Hz, 1H), 2.18–2.06 (m, 1H), 1.83–1.63 (m, 5H), 1.35–1.11 (m, 5H).  $^{13}\text{C}$  NMR (100 MHz,  $\text{CDCl}_3$ )  $\delta$  138.85 (d,  $J = 13.6$  Hz), 130.90 (q,  $J = 32.0$  Hz), 129.13 (d,  $J = 1.1$  Hz), 128.81, 126.12, 125.67, 123.22 (q,  $J = 3.8$  Hz), 122.96, 122.57 (q,  $J = 3.8$  Hz), 41.19, 32.81, 26.13, 26.00. HRMS (TOF MS  $\text{EI}^+$ )  $m/z$  calcd for  $[\text{C}_{15}\text{H}_{17}\text{F}_3]$  254.1282, found 254.1291.

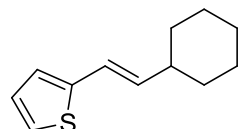

**(E)-2-(2-Cyclohexylvinyl)thiophene(3p, known compound):** Colorless oil,  $^1\text{H}$  NMR (400 MHz,  $\text{CDCl}_3$ )  $\delta$  7.04 (d,  $J = 5.1$  Hz, 1H), 6.90 (dd,  $J = 5.1$ , 3.5 Hz, 1H), 6.84 (d,  $J = 3.6$  Hz, 1H), 6.45 (d,  $J = 15.8$  Hz, 1H), 6.01 (dd,  $J = 15.8$ , 6.9 Hz, 1H), 2.12–1.99 (m, 1H), 1.82–1.72 (m, 5H), 1.33–1.11 (m, 5H).  $^{13}\text{C}$  NMR (100 MHz,  $\text{CDCl}_3$ )  $\delta$  143.38, 136.69, 127.10, 124.13, 122.89, 120.61, 40.89, 32.77, 26.11, 25.97.

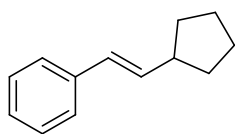

**(E)-2-(2-Cyclopentylvinyl)benzene(4a, known compound):** Colorless oil,  $^1\text{H}$  NMR (400 MHz,  $\text{CDCl}_3$ )  $\delta$  7.34–7.29 (m, 2H), 7.25 (dd,  $J = 10.4, 4.9$  Hz, 2H), 7.14 (ddd,  $J = 8.5, 2.5, 1.2$  Hz, 1H), 6.35 (d,  $J = 15.9$  Hz, 1H), 6.18 (dd,  $J = 15.8, 7.7$  Hz, 1H), 2.62–2.51 (m, 1H), 1.90–1.78 (m, 2H), 1.74–1.52 (m, 4H), 1.44–1.32 (m, 2H).  $^{13}\text{C}$  NMR (100 MHz,  $\text{CDCl}_3$ )  $\delta$  137.90, 135.56, 128.39, 127.88, 126.65, 125.88, 43.78, 33.18, 25.21.

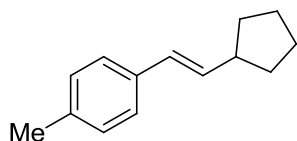

**(E)-1-(2-Cyclopentylvinyl)-4-methylbenzene(4b, known compound):** Colorless oil,  $^1\text{H}$  NMR (400 MHz,  $\text{CDCl}_3$ )  $\delta$  7.48 (d,  $J = 6.5$  Hz, 2H), 7.32 (d,  $J = 7.5$  Hz, 2H), 6.59 (d,  $J = 15.8$  Hz, 1H), 6.39 (ddd,  $J = 15.8, 7.7, 1.7$  Hz, 1H), 2.93–2.73 (m, 1H), 2.55 (s, 3H), 2.21–1.58 (m, 8H).  $^{13}\text{C}$  NMR (100 MHz,  $\text{CDCl}_3$ )  $\delta$  136.15, 135.12, 134.37, 129.05, 127.76, 125.78, 43.78, 33.20, 25.19, 21.01.

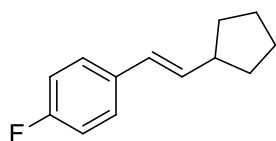

**(E)-1-(2-Cyclopentylvinyl)-4-fluorobenzene(4c):** Colorless oil,  $^1\text{H}$  NMR (400 MHz,  $\text{CDCl}_3$ )  $\delta$  7.31–7.23 (m, 2H), 6.98–6.93 (m, 2H), 6.31 (d,  $J = 15.8$  Hz, 1H), 6.09 (dd,  $J = 15.8, 7.8$  Hz, 1H), 2.71–2.42 (m, 1H), 1.95–1.22 (m, 4H).  $^{13}\text{C}$  NMR (100 MHz,  $\text{CDCl}_3$ )  $\delta$  161.82 (d,  $J = 245.5$  Hz), 135.35 (d,  $J = 2.2$  Hz), 134.07 (d,  $J = 3.2$  Hz), 127.27 (d,  $J = 7.8$  Hz), 126.71, 115.23 (d,  $J = 21.4$  Hz), 43.75, 33.19, 25.20. HRMS (TOF MS  $\text{EI}^+$ )  $m/z$  calcd for  $[\text{C}_{13}\text{H}_{15}\text{F}]$  190.1158, found 190.1151.

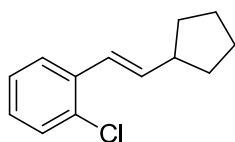

**(E)-1-Chloro-2-(2-cyclopentylvinyl)benzene(4d):** Colorless oil,  $^1\text{H}$  NMR (400 MHz,  $\text{CDCl}_3$ )  $\delta$  7.31 (s, 1H), 7.24–7.06 (m, 3H), 6.27 (d,  $J = 15.8$  Hz, 1H), 6.18 (dd,  $J = 15.8, 7.4$  Hz, 1H), 2.68–2.41 (m, 1H), 1.92–1.30 (m, 8H).  $^{13}\text{C}$  NMR (100 MHz,  $\text{CDCl}_3$ )  $\delta$  139.82, 137.17, 134.35, 129.56, 126.63, 126.55, 125.77, 124.14, 43.71, 33.09, 25.20. HRMS (TOF MS  $\text{EI}^+$ )  $m/z$  calcd for  $[\text{C}_{13}\text{H}_{15}\text{Cl}]$  206.0862, found 206.0861.

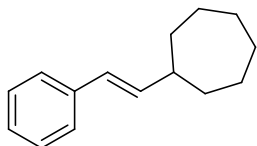

**(E)-Styrylcycloheptane(4e, known compound):** Colorless oil,  $^1\text{H}$  NMR (400 MHz,  $\text{CDCl}_3$ )  $\delta$  7.31 (dd,  $J = 8.3, 1.1$  Hz, 2H), 7.25 (dd,  $J = 10.4, 4.9$  Hz, 2H), 7.17–7.10 (m, 1H), 6.30 (d,  $J = 16.0$  Hz, 1H), 6.19 (dd,  $J = 15.9, 7.4$  Hz, 1H), 2.37–2.24 (m, 1H), 1.83–1.78 (m, 2H), 1.68–1.37(m, 10H).  $^{13}\text{C}$  NMR (100 MHz,  $\text{CDCl}_3$ )  $\delta$  138.09, 137.53, 128.38, 126.70, 126.61, 125.90, 43.20, 34.71, 28.38, 26.25.

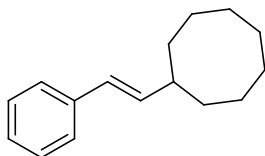

**(E)-Styrylcyclooctane(4f, known compound):** Colorless oil,  $^1\text{H}$  NMR (400 MHz,  $\text{CDCl}_3$ )  $\delta$  7.33–7.28 (m, 2H), 7.24 (dd,  $J = 10.4, 4.9$  Hz, 2H), 7.13 (dd,  $J = 10.2, 4.3$  Hz, 1H), 6.30 (d,  $J = 16.0$  Hz, 1H), 6.18 (dd,  $J = 15.9, 7.4$  Hz, 1H), 2.43–2.30 (m, 1H), 1.79–1.44 (m, 14H).  $^{13}\text{C}$  NMR (100 MHz,  $\text{CDCl}_3$ )  $\delta$  138.08, 137.61, 128.35, 126.88, 126.58, 125.89, 41.29, 31.83, 27.43, 25.98, 25.06.



### 3. $^1\text{H}$ and $^{13}\text{C}$ NMR spectra

#### $^1\text{H}$ - and $^{13}\text{C}$ NMR of 3a

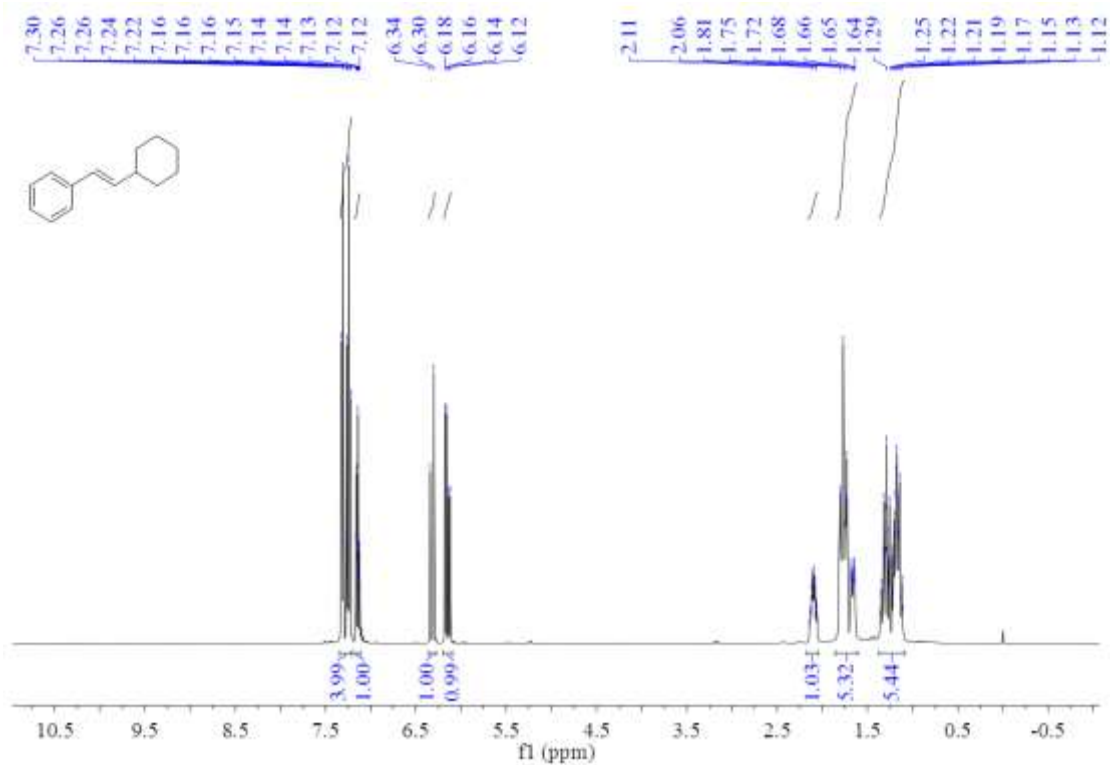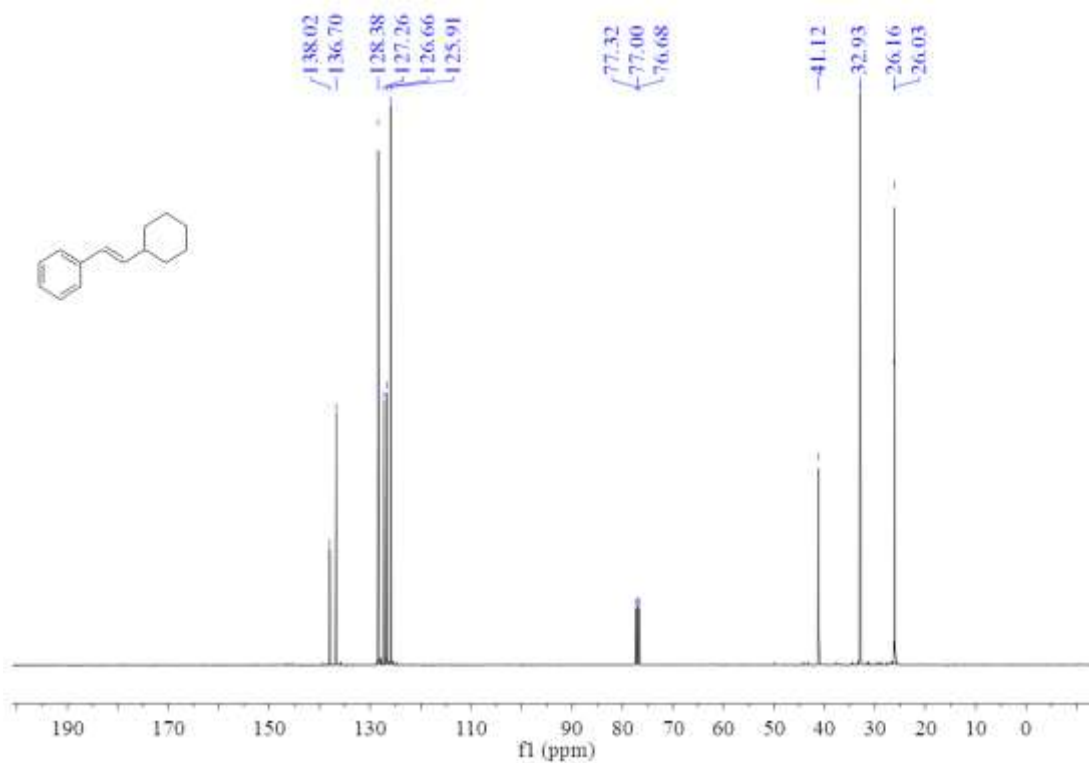

<sup>1</sup>H- and <sup>13</sup>C NMR of 3b

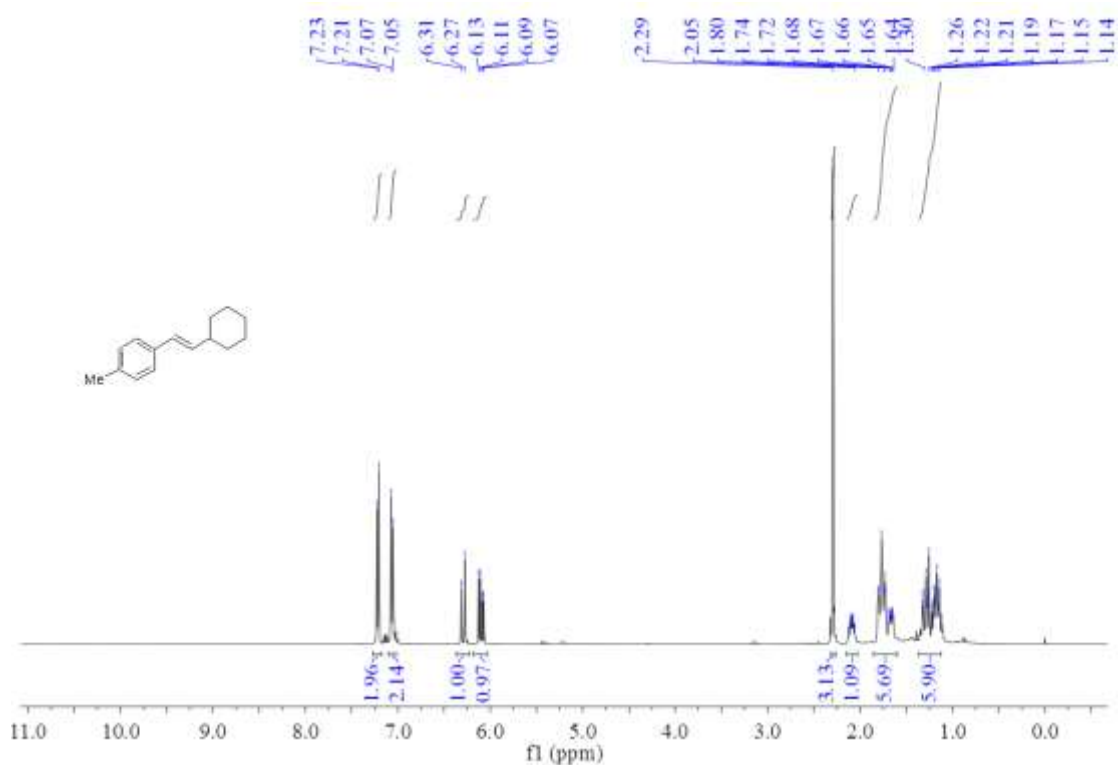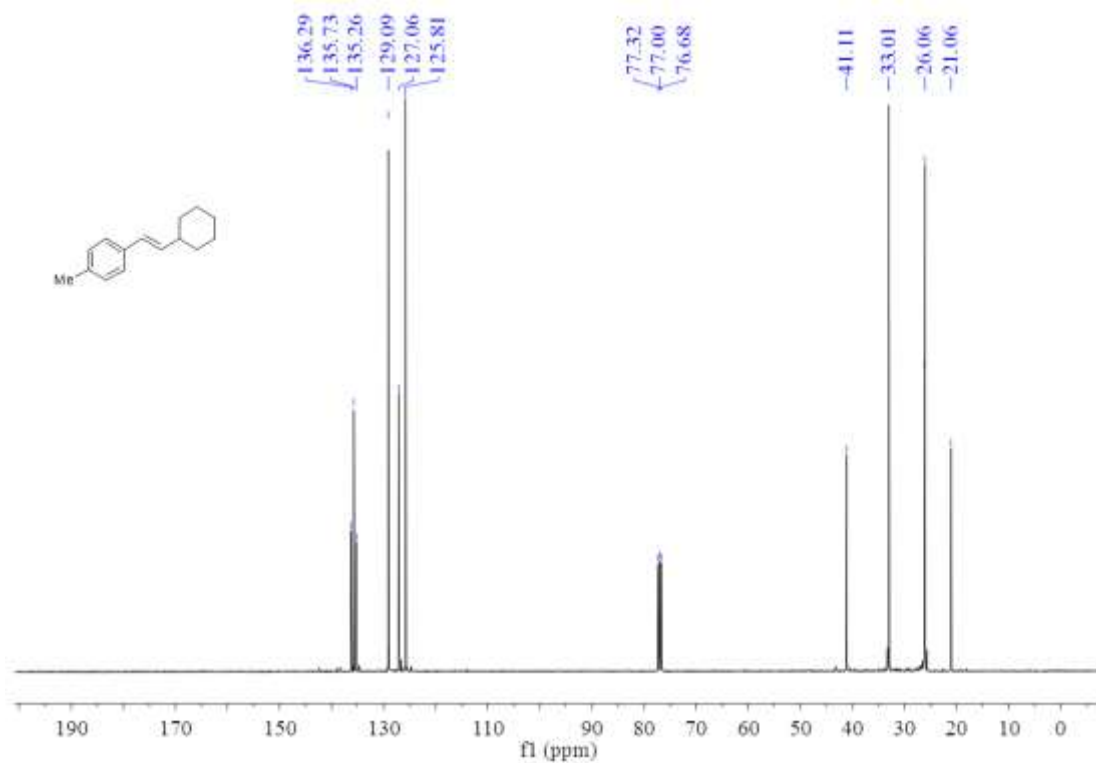

<sup>1</sup>H- and <sup>13</sup>C NMR of 3c

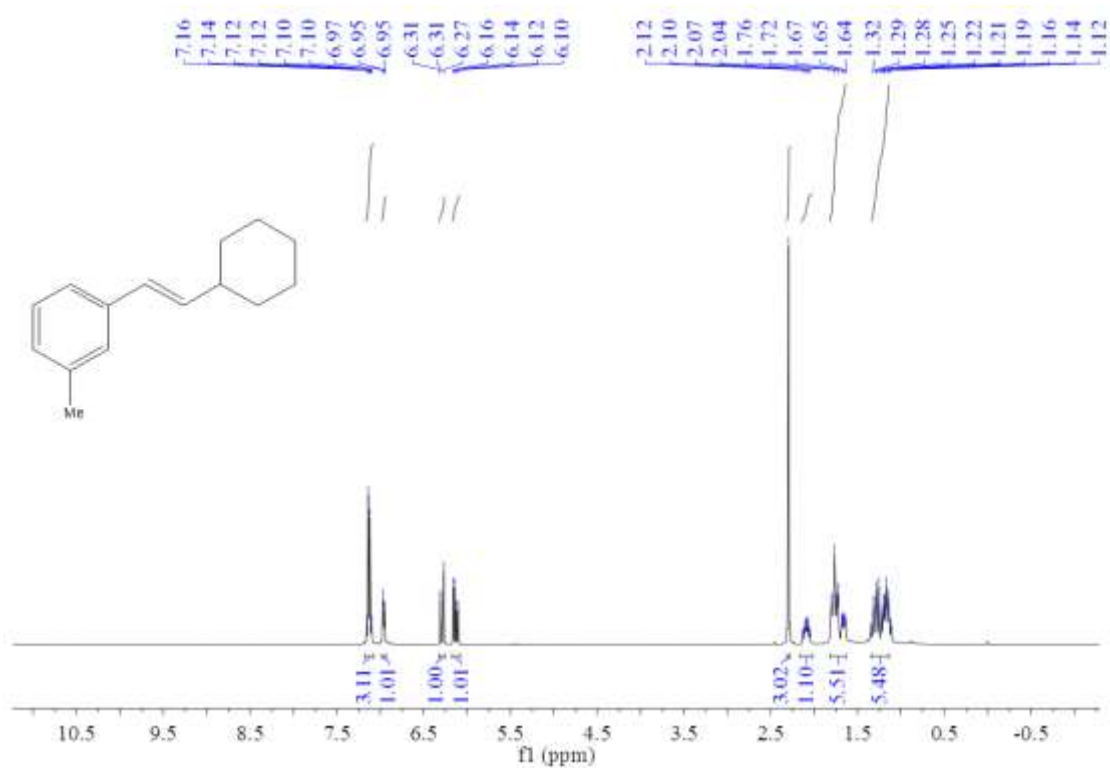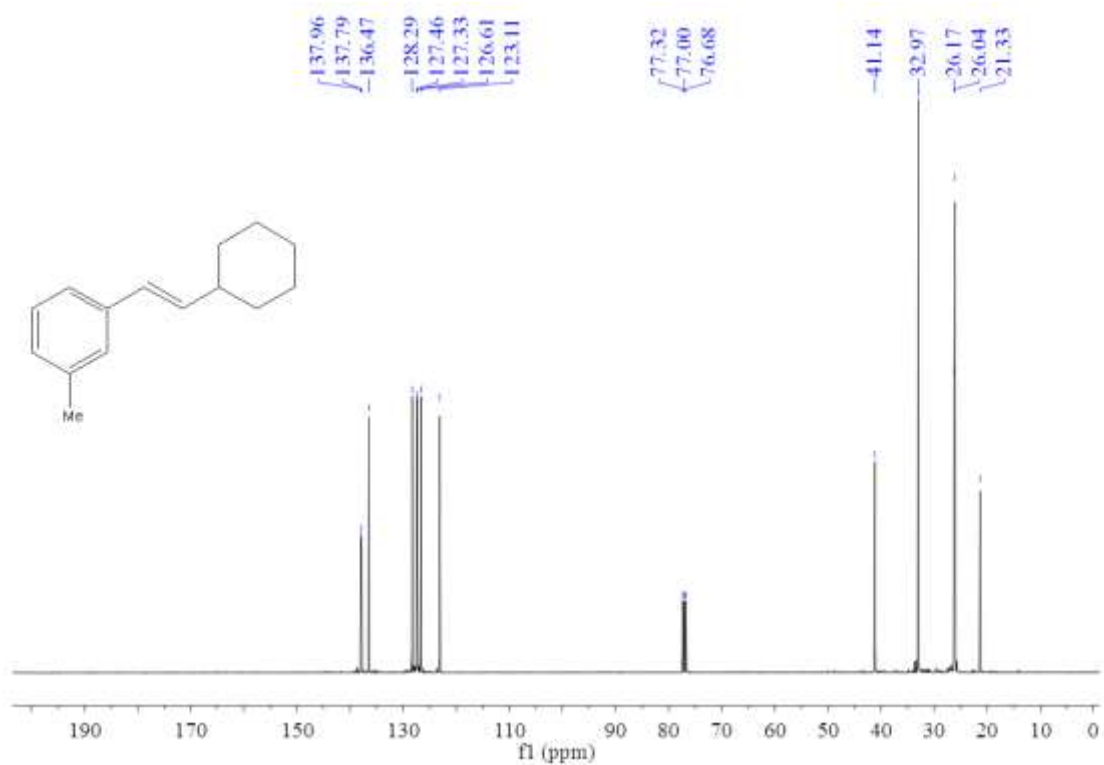

**<sup>1</sup>H- and <sup>13</sup>C NMR of 3d**

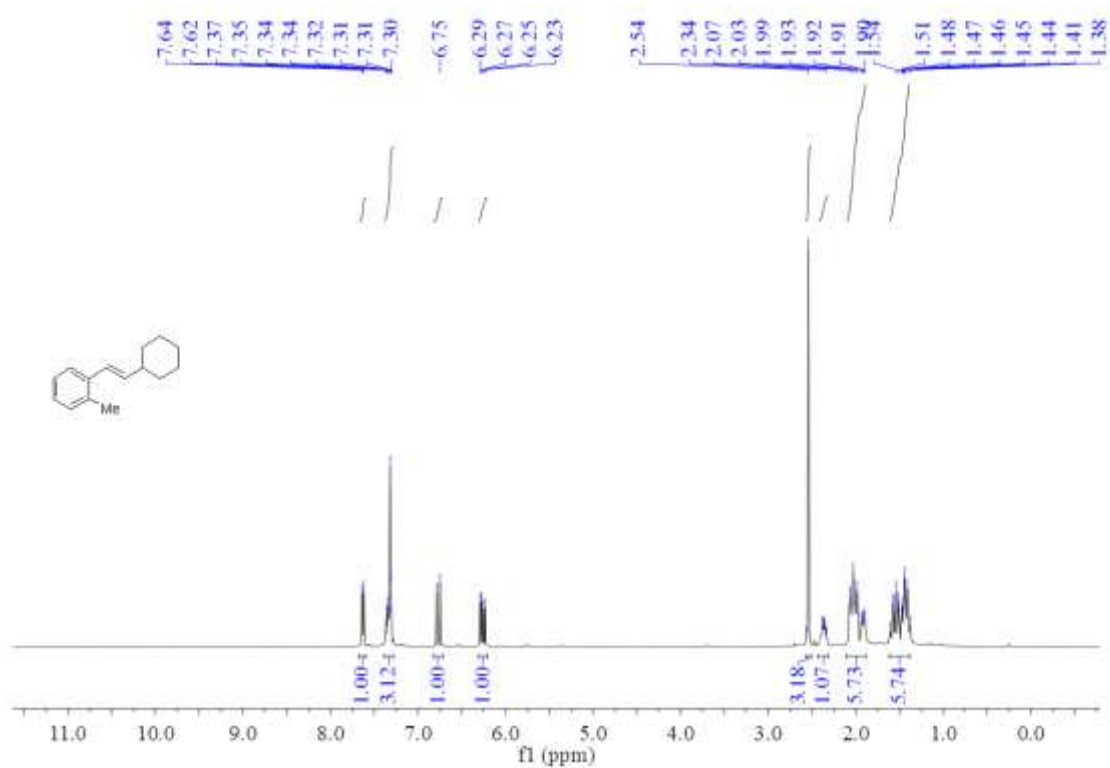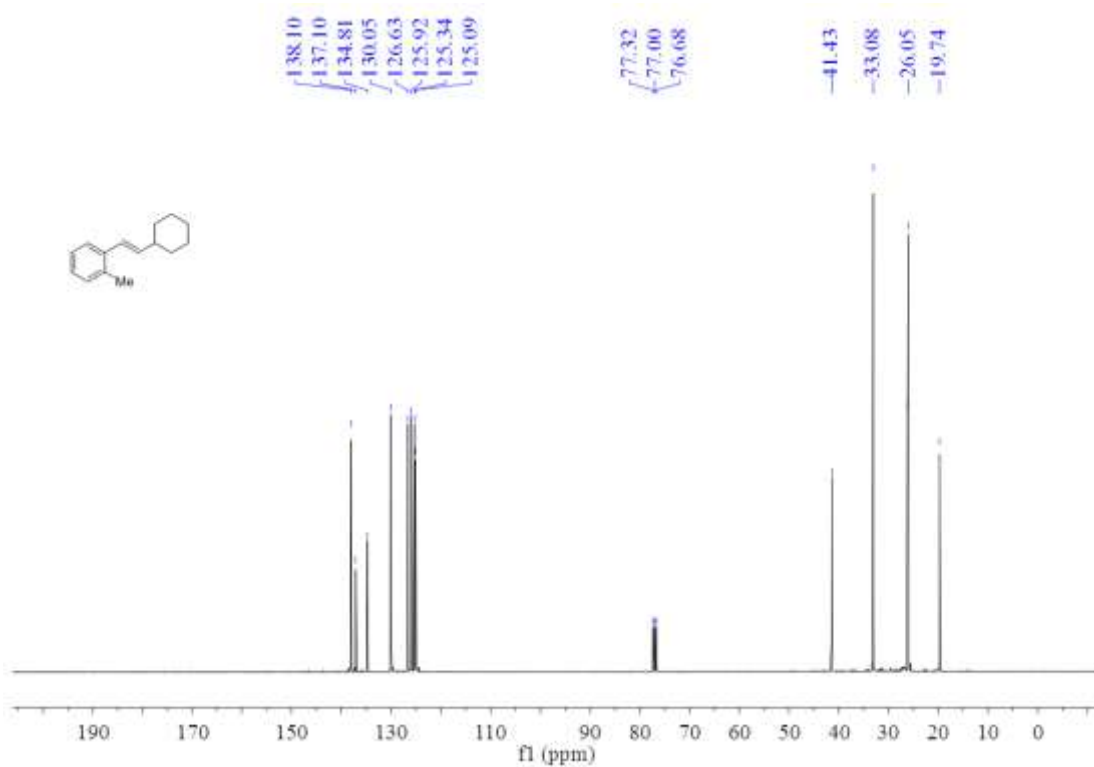

<sup>1</sup>H- and <sup>13</sup>C NMR of 3e

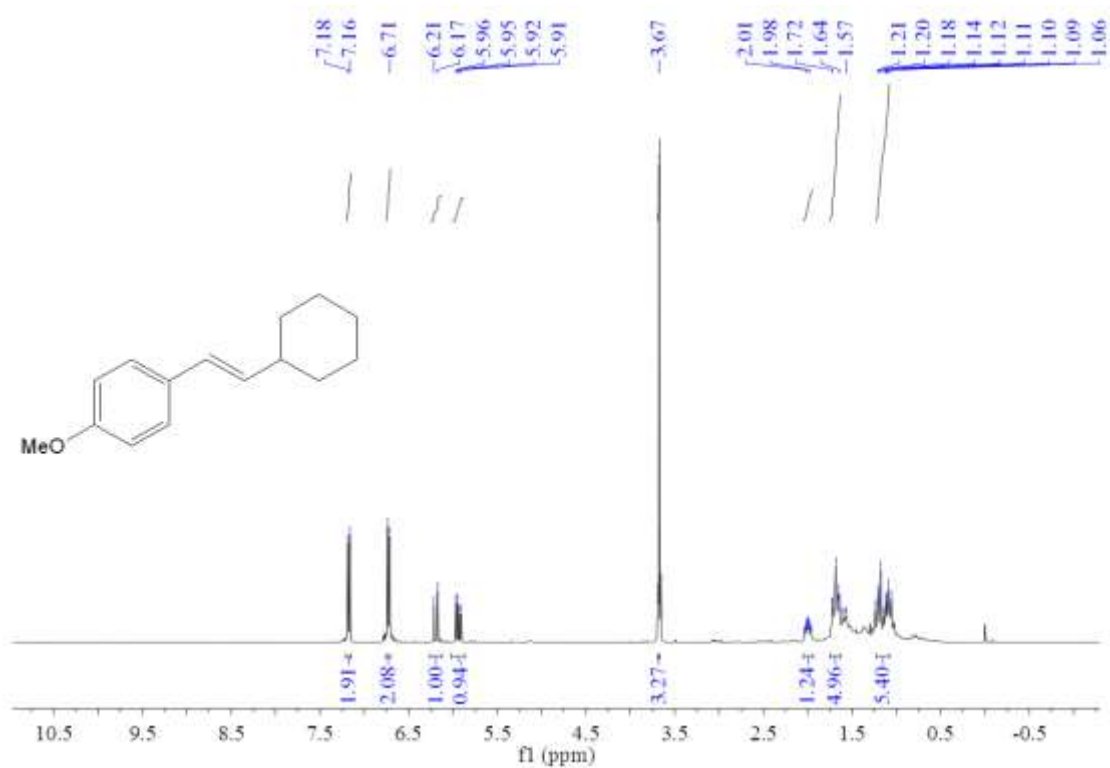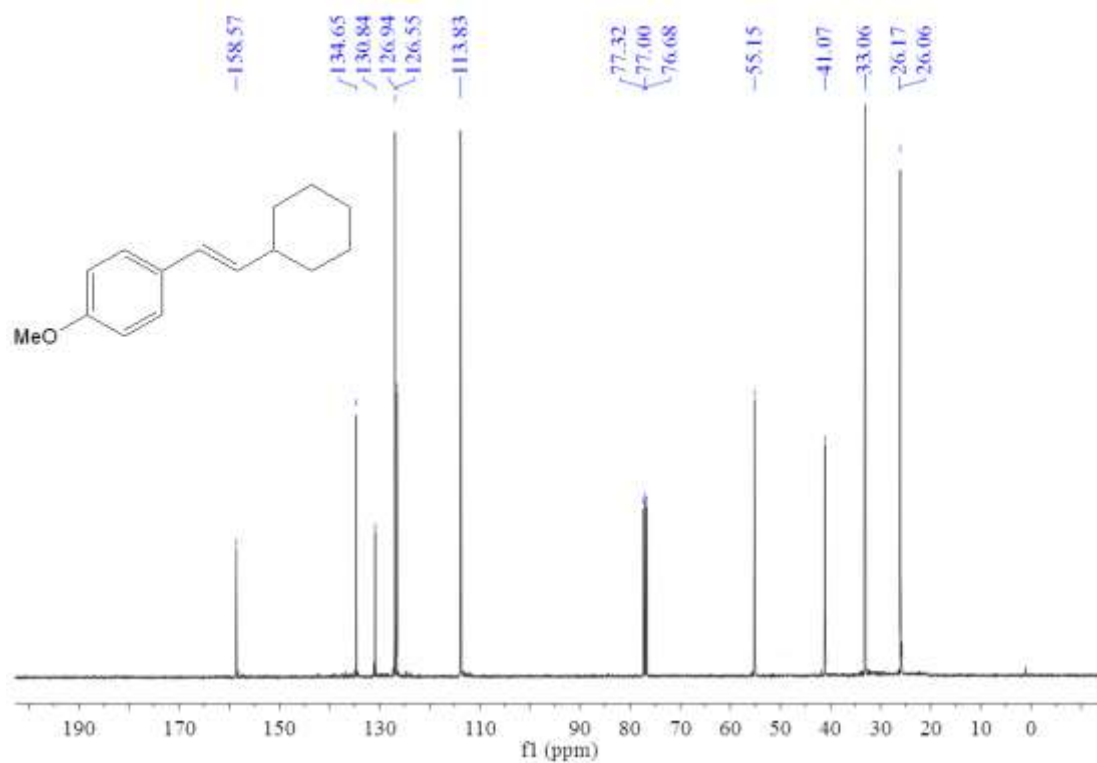

<sup>1</sup>H- and <sup>13</sup>C NMR of 3f

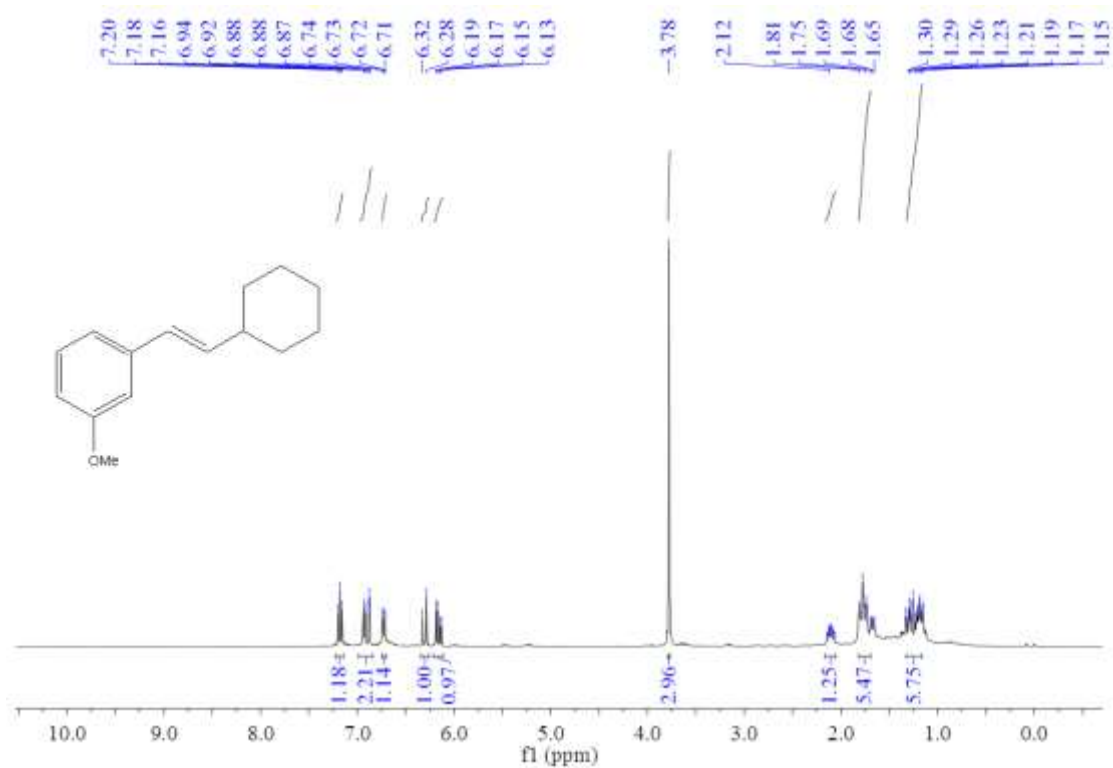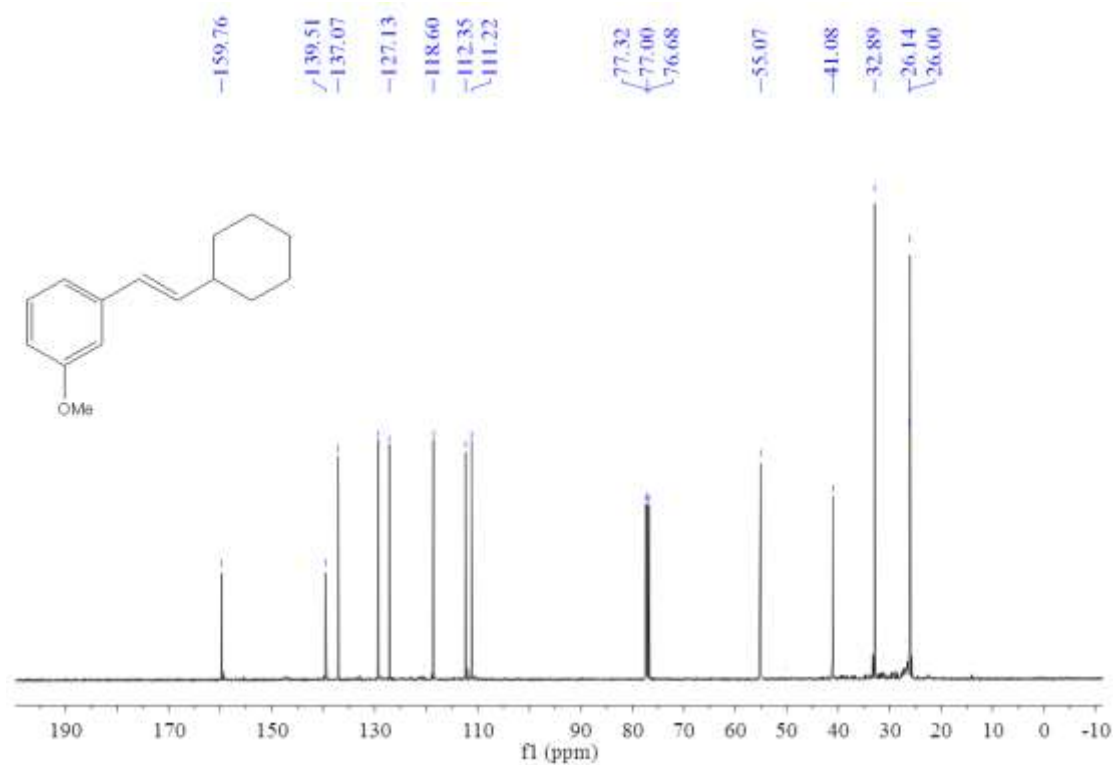

<sup>1</sup>H- and <sup>13</sup>C NMR of 3g

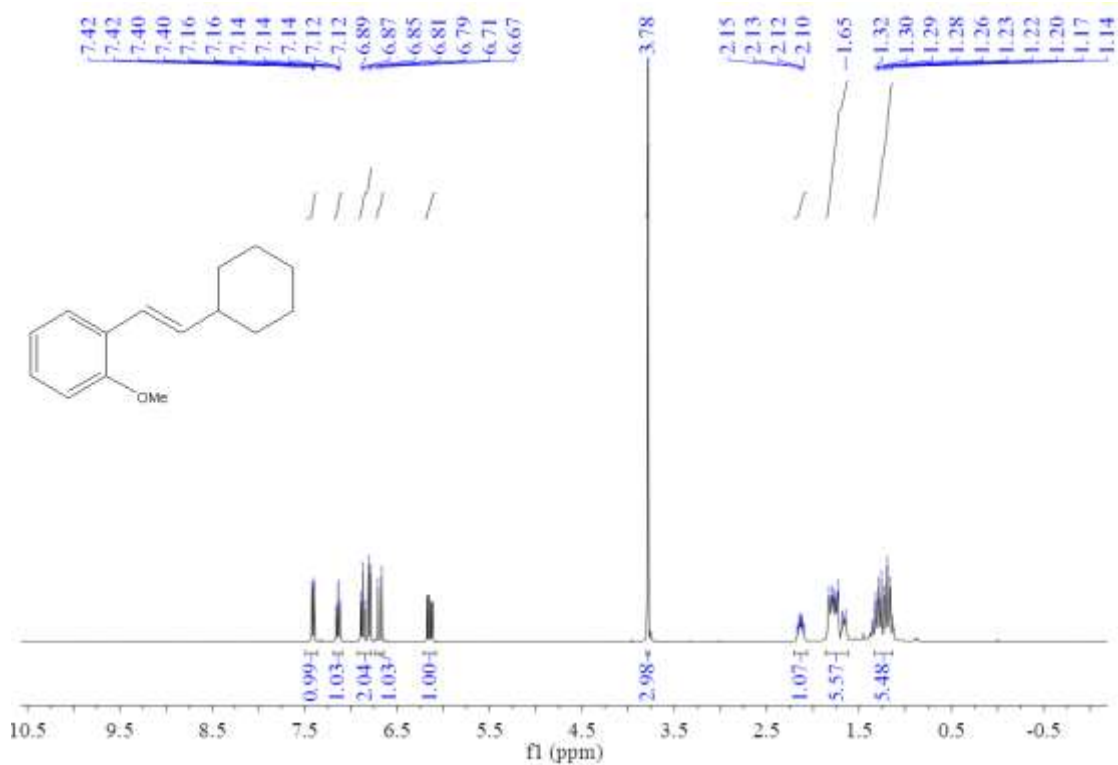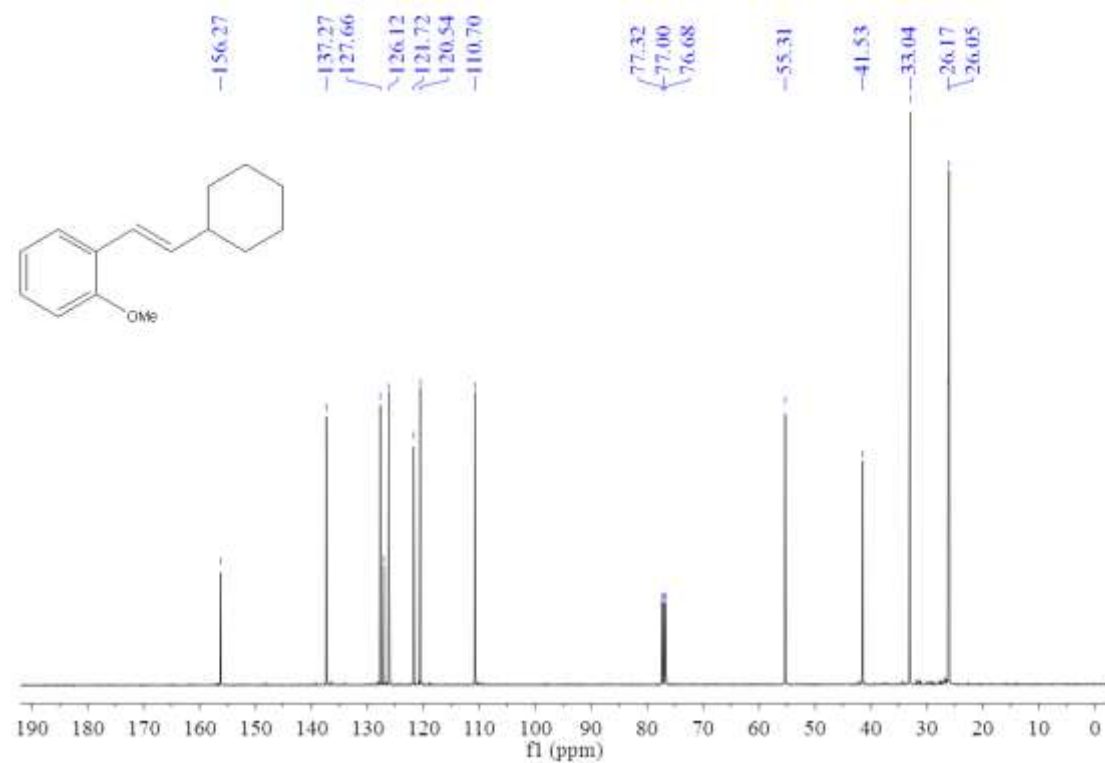

$^1\text{H}$ - and  $^{13}\text{C}$  NMR of 3h

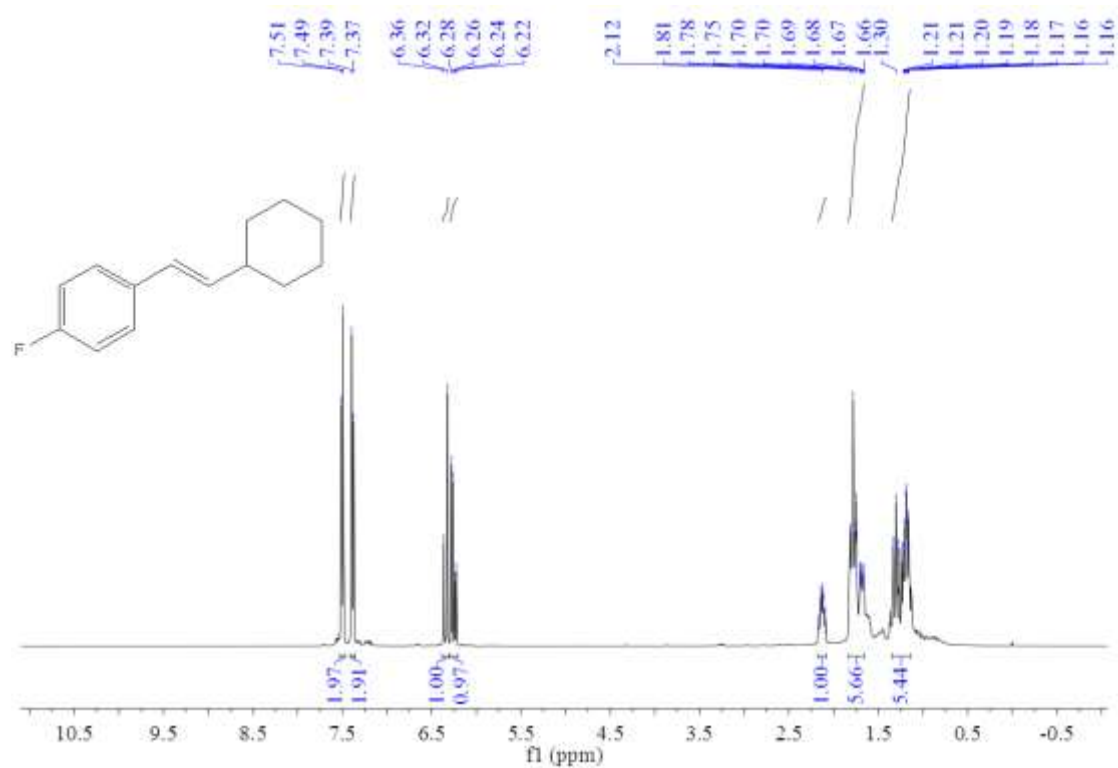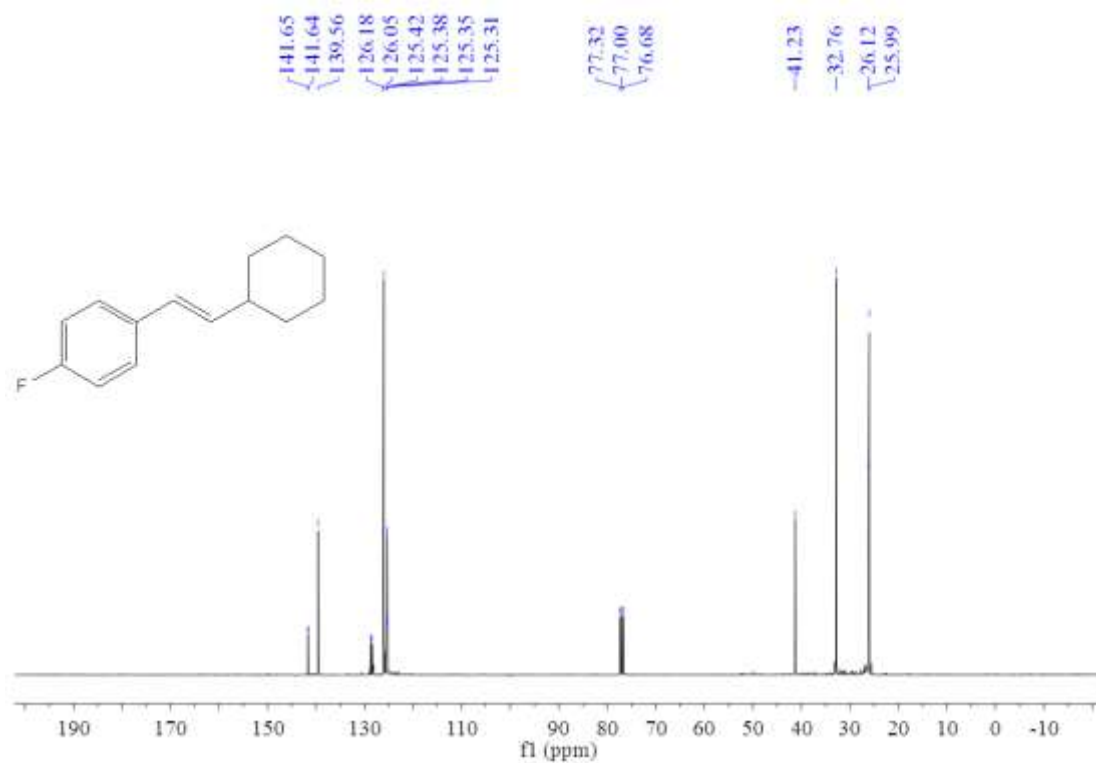



<sup>1</sup>H- and <sup>13</sup>C NMR of 3i

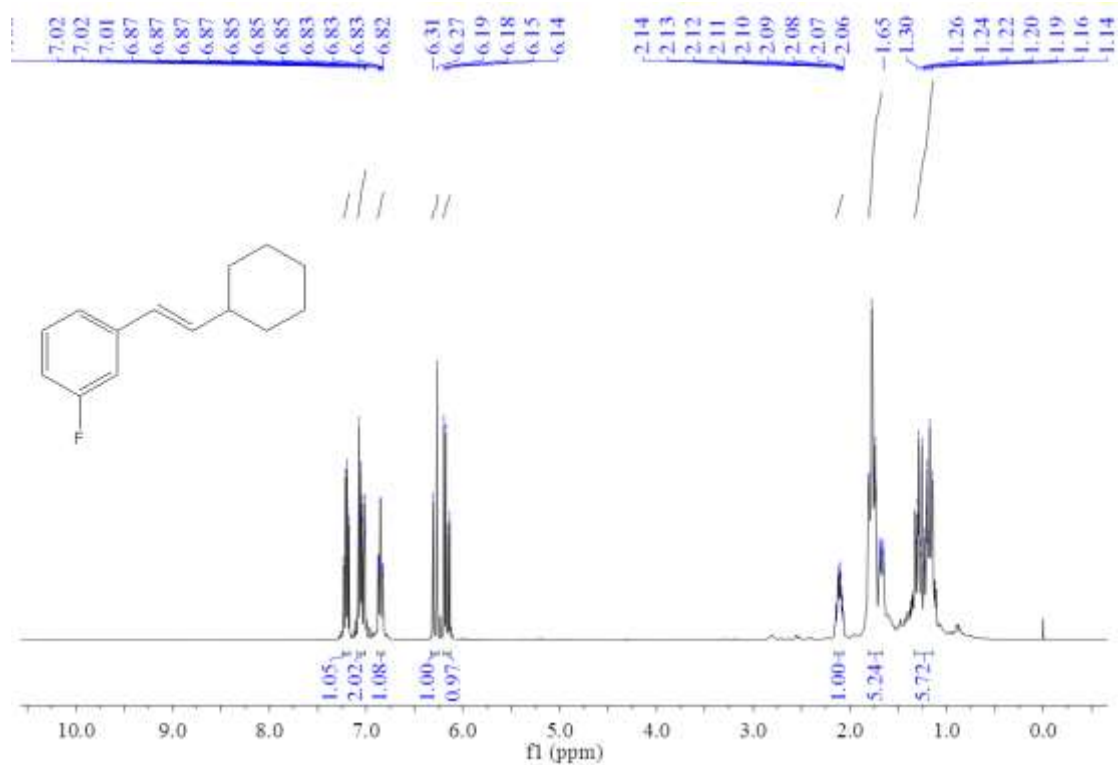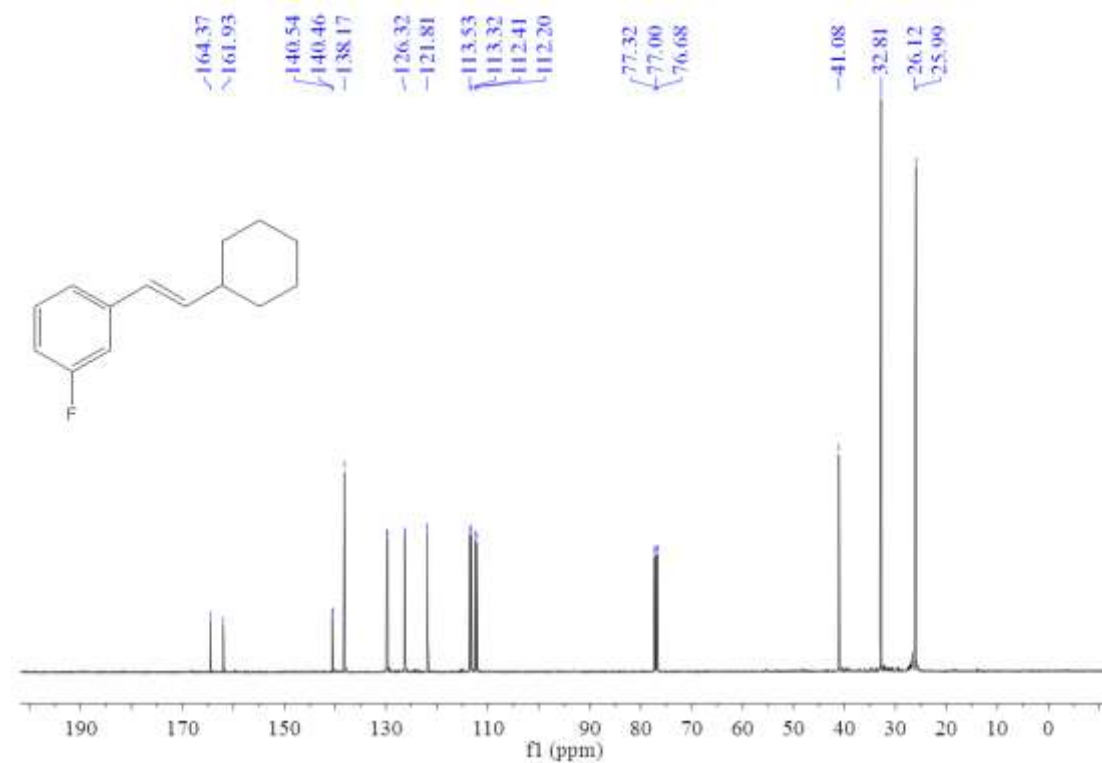

<sup>1</sup>H- and <sup>13</sup>C NMR of 3j

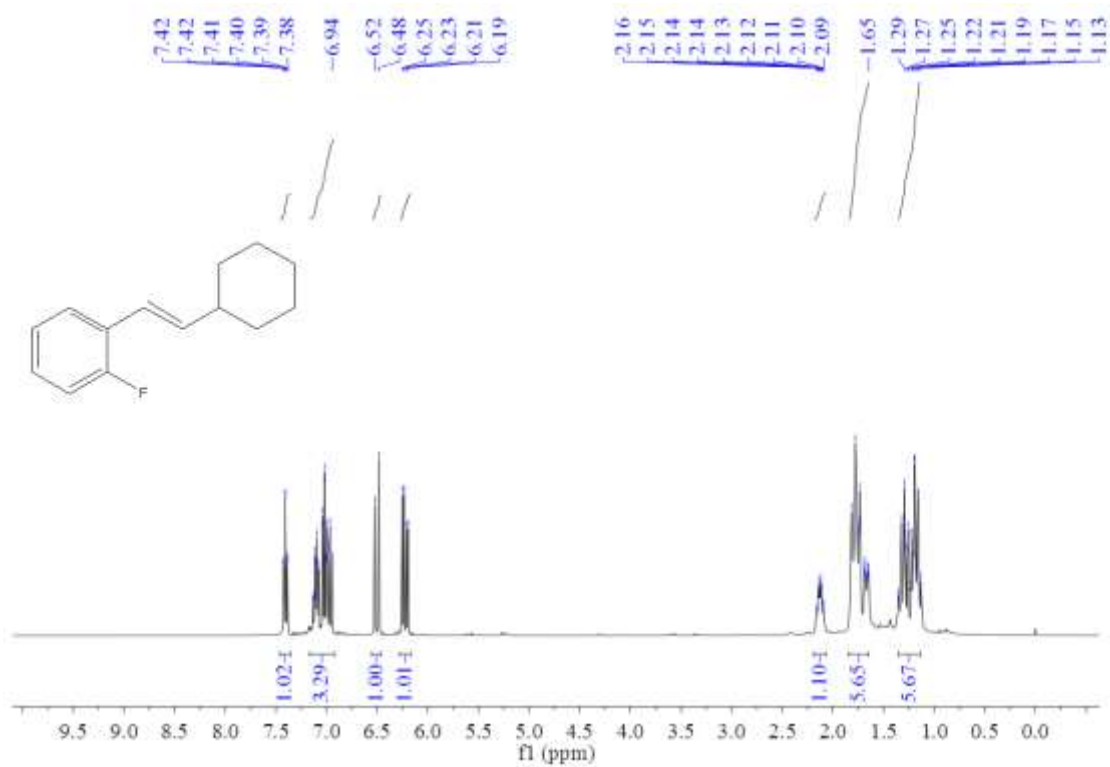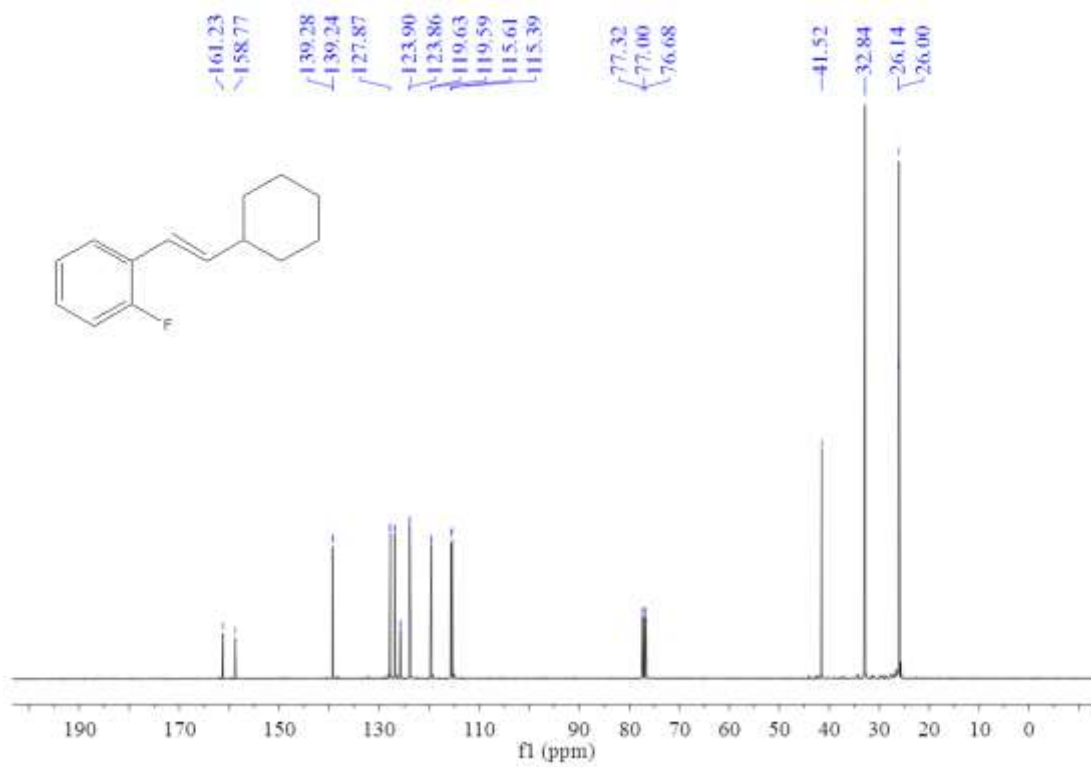

<sup>1</sup>H- and <sup>13</sup>C NMR of 3k

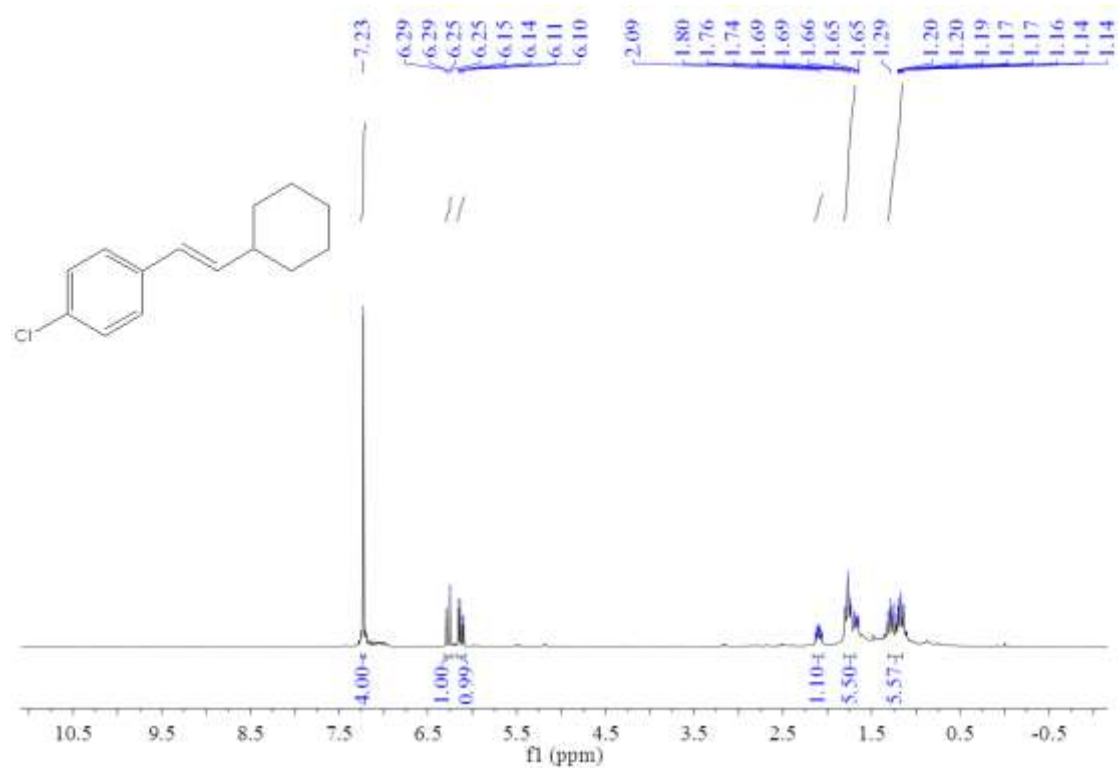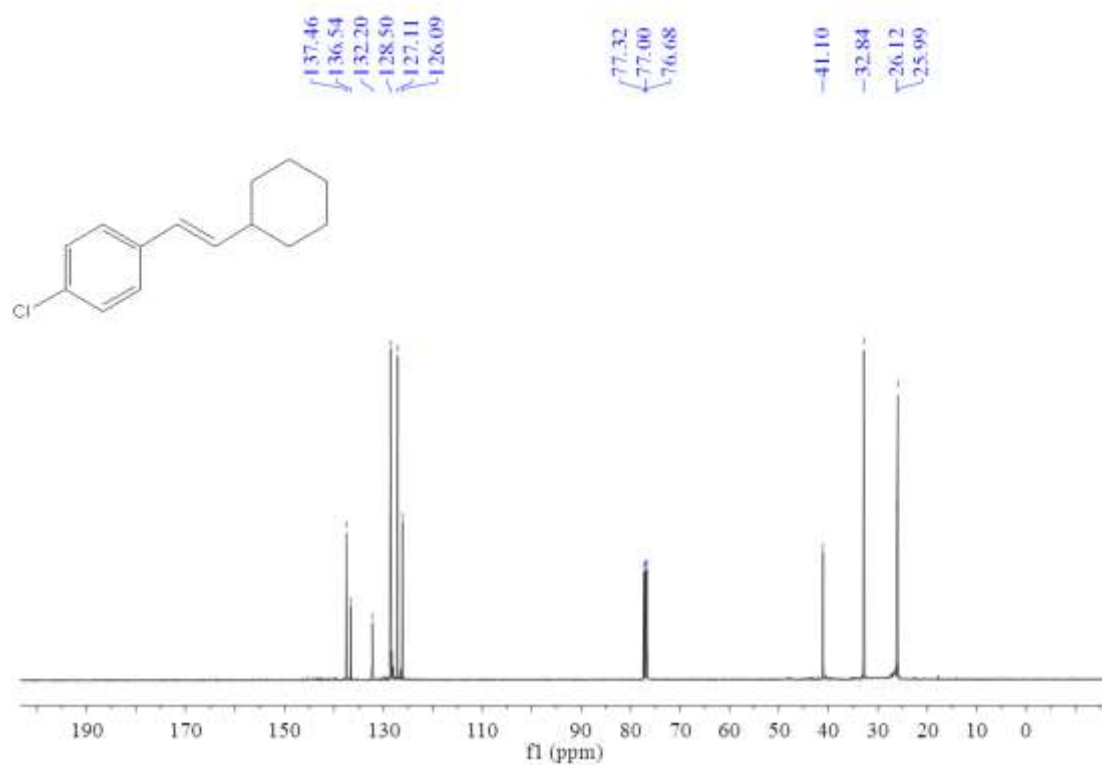

# <sup>1</sup>H- and <sup>13</sup>C NMR of 3l

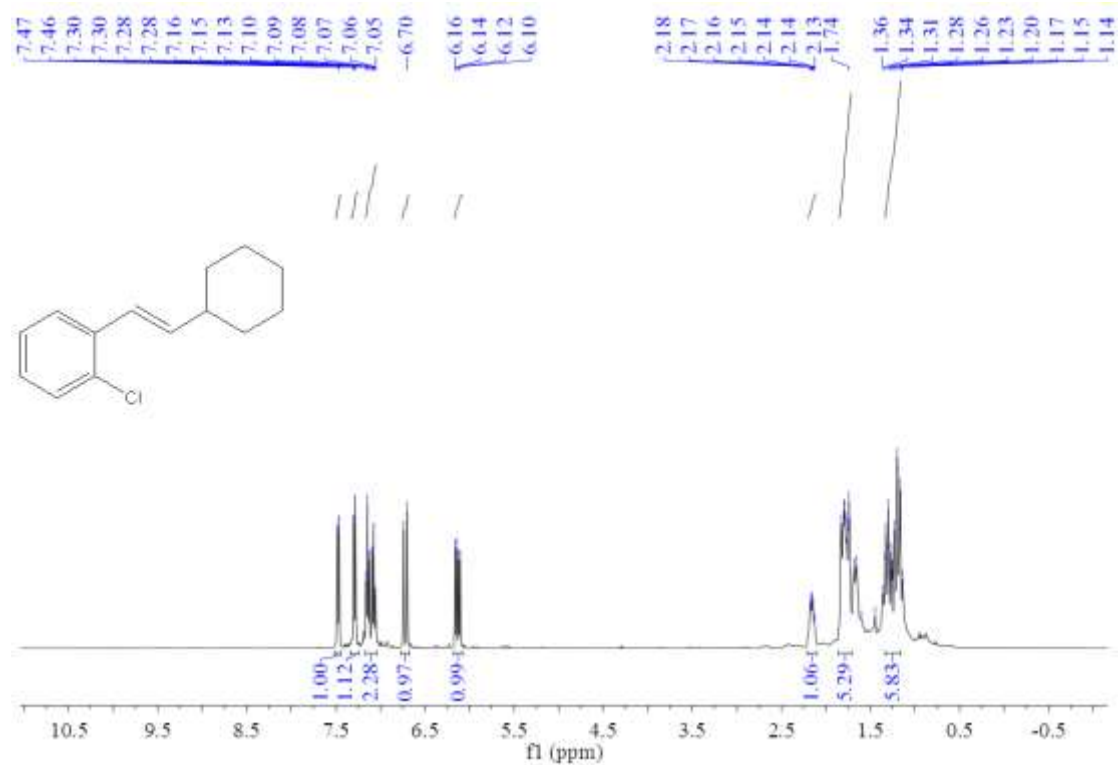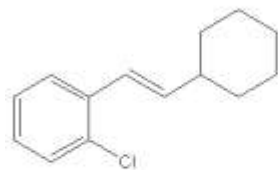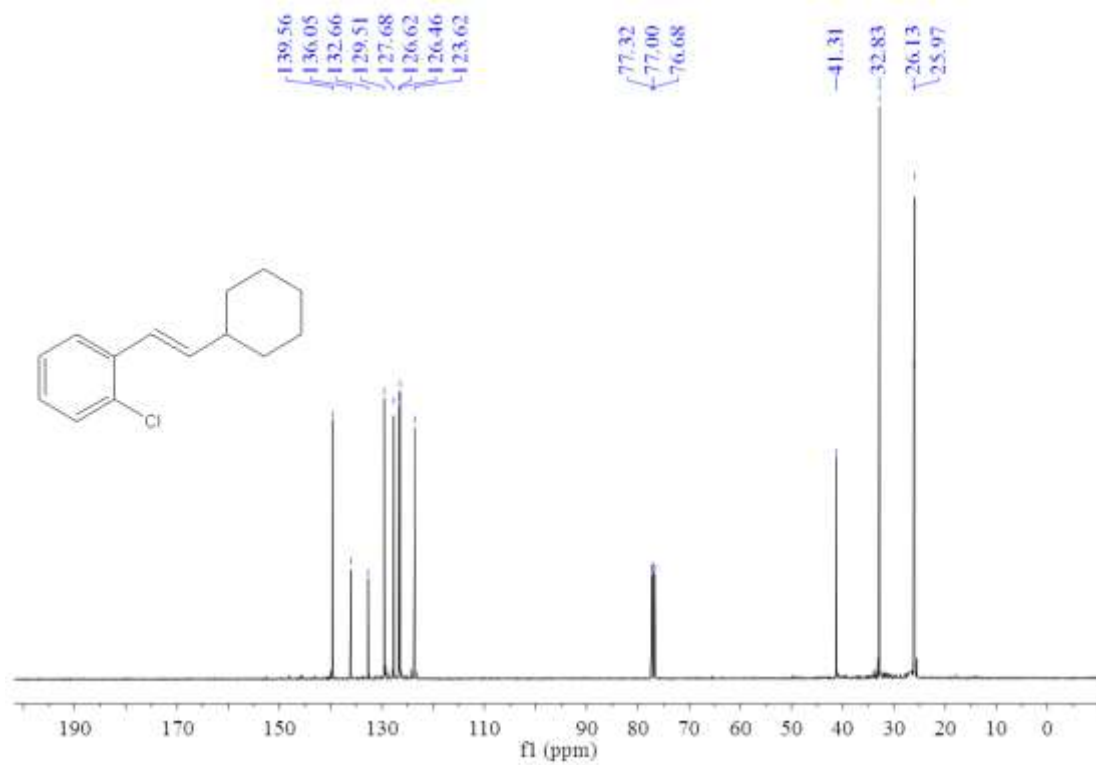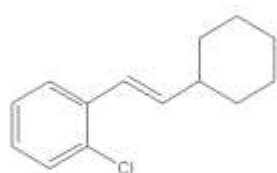

<sup>1</sup>H- and <sup>13</sup>C NMR of 3m

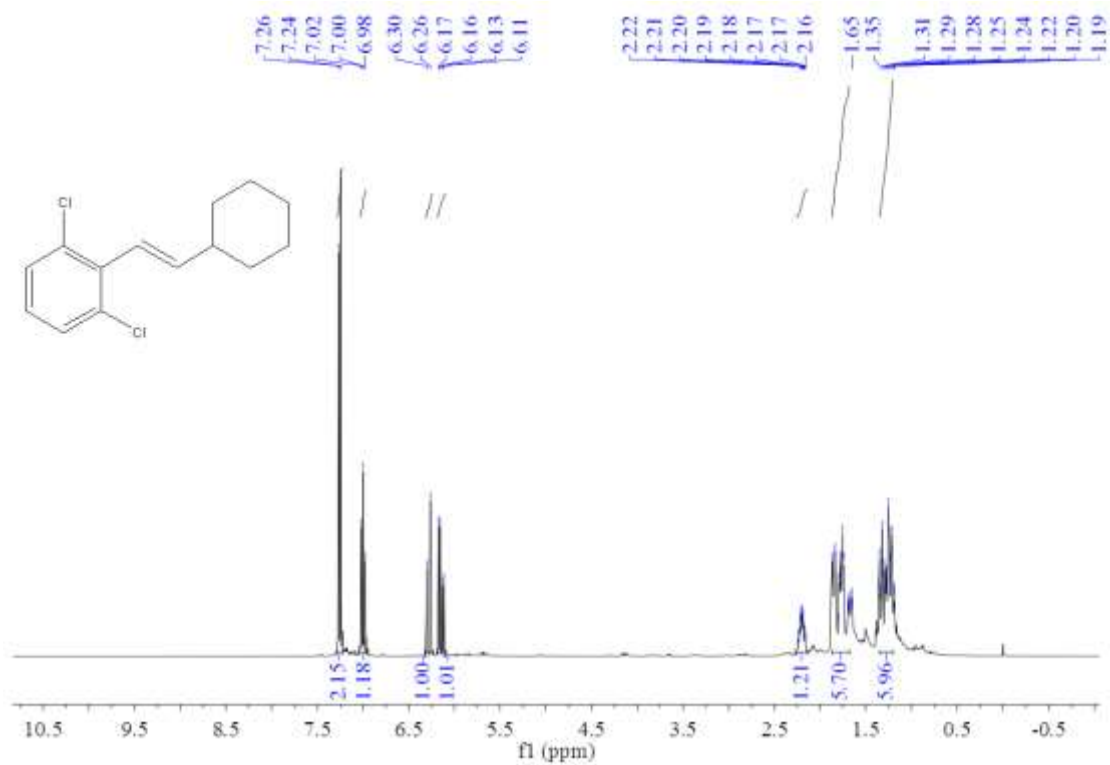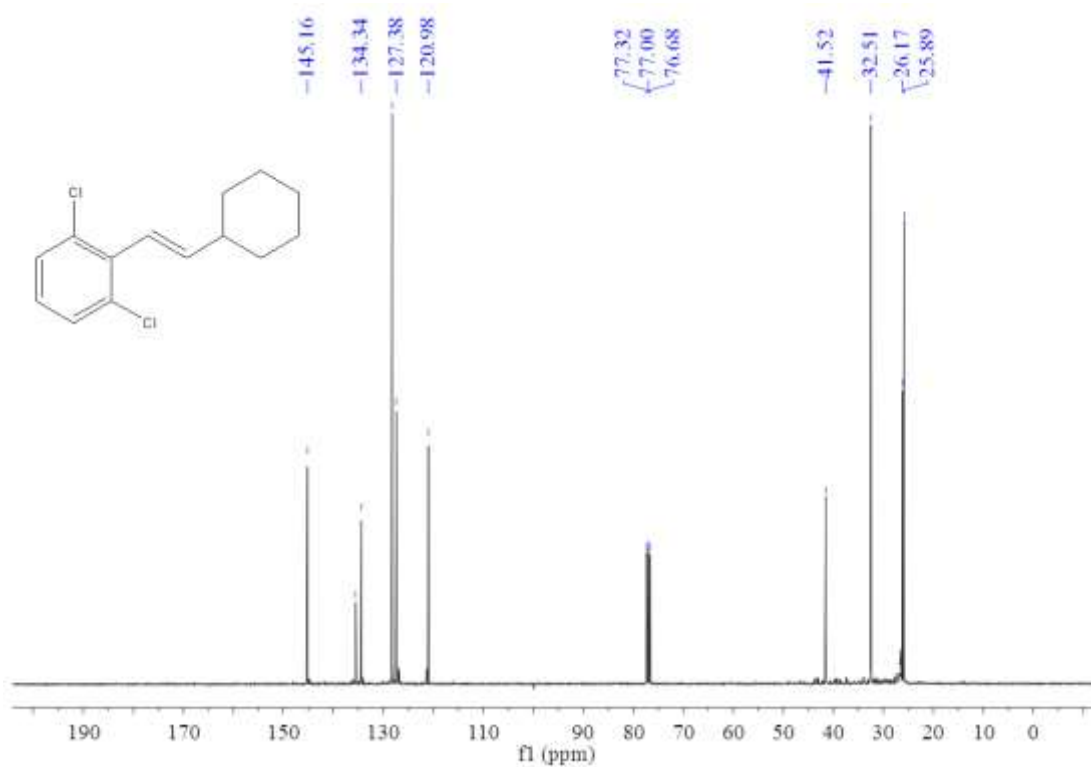

<sup>1</sup>H- and <sup>13</sup>C NMR of 3n

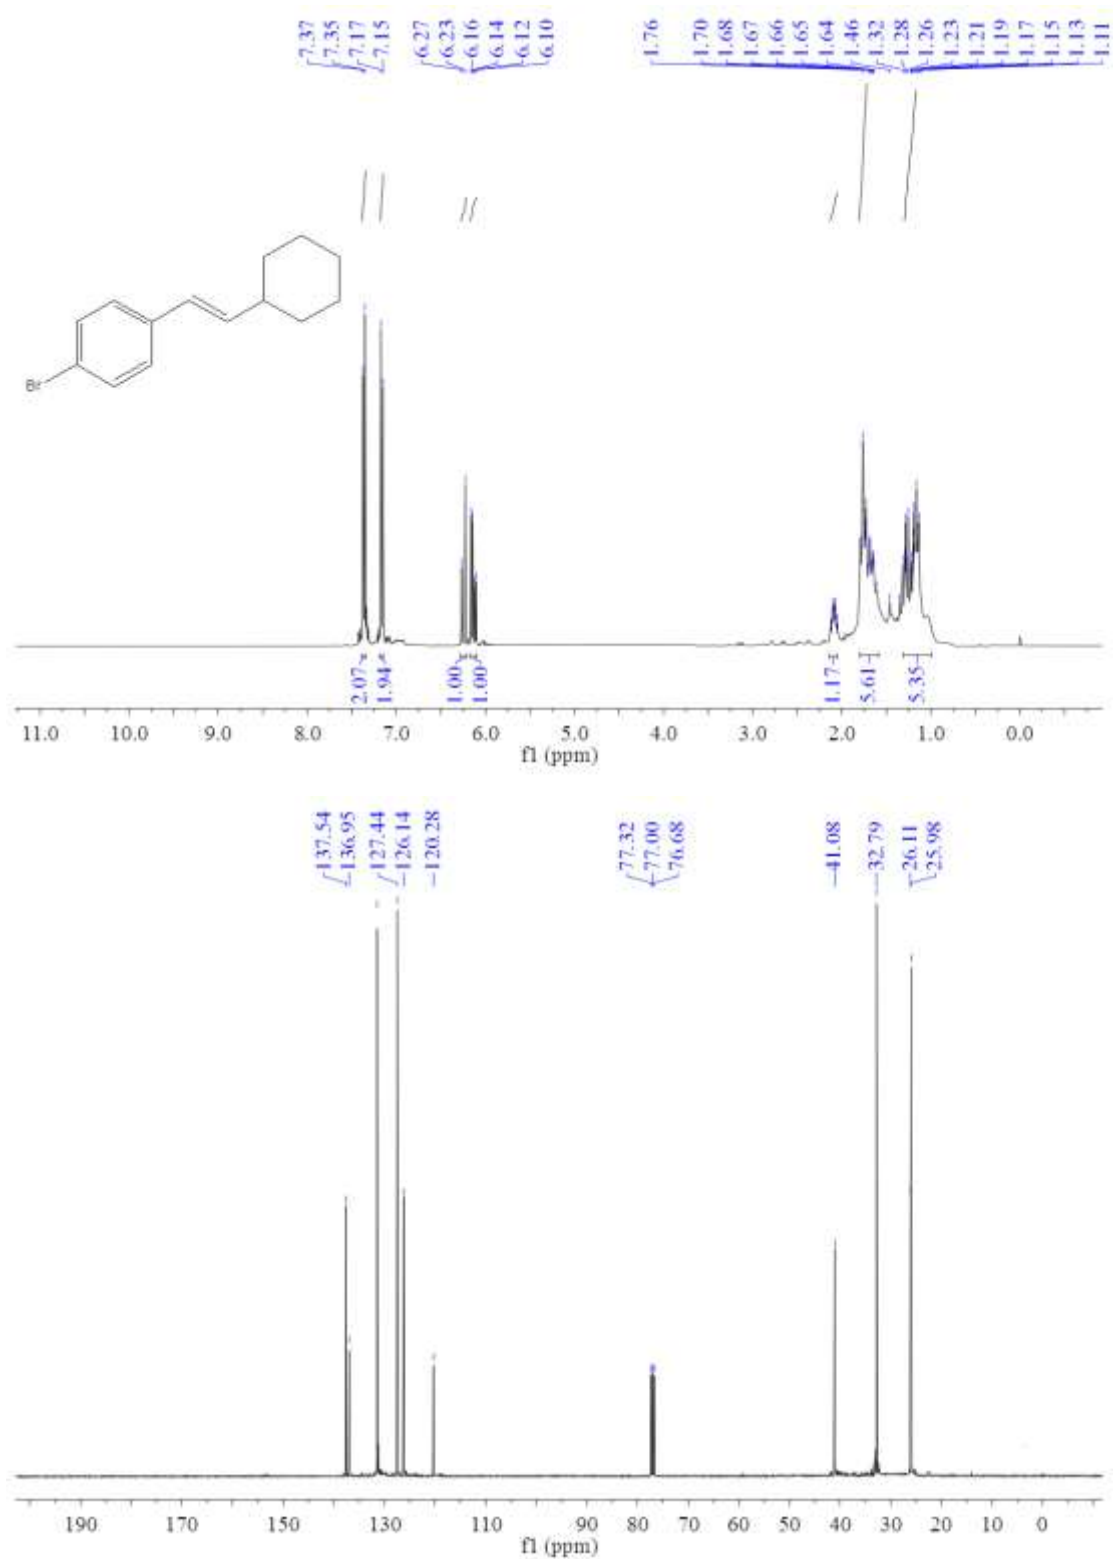

<sup>1</sup>H- and <sup>13</sup>C NMR of 3o

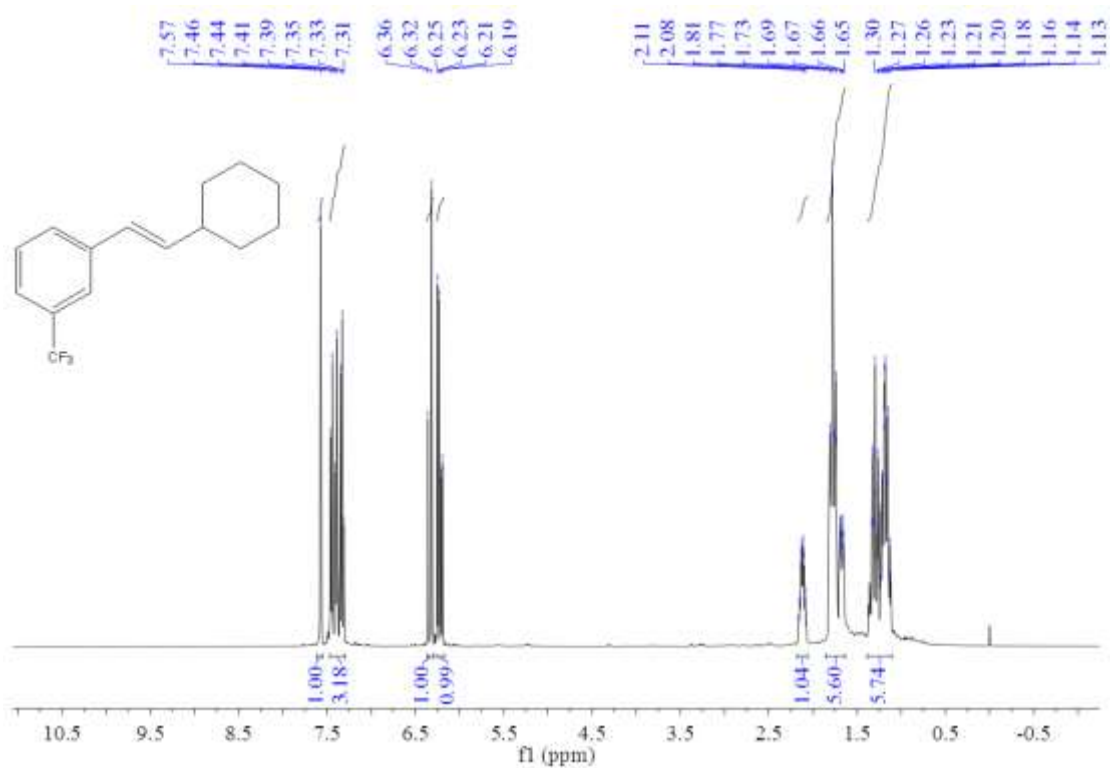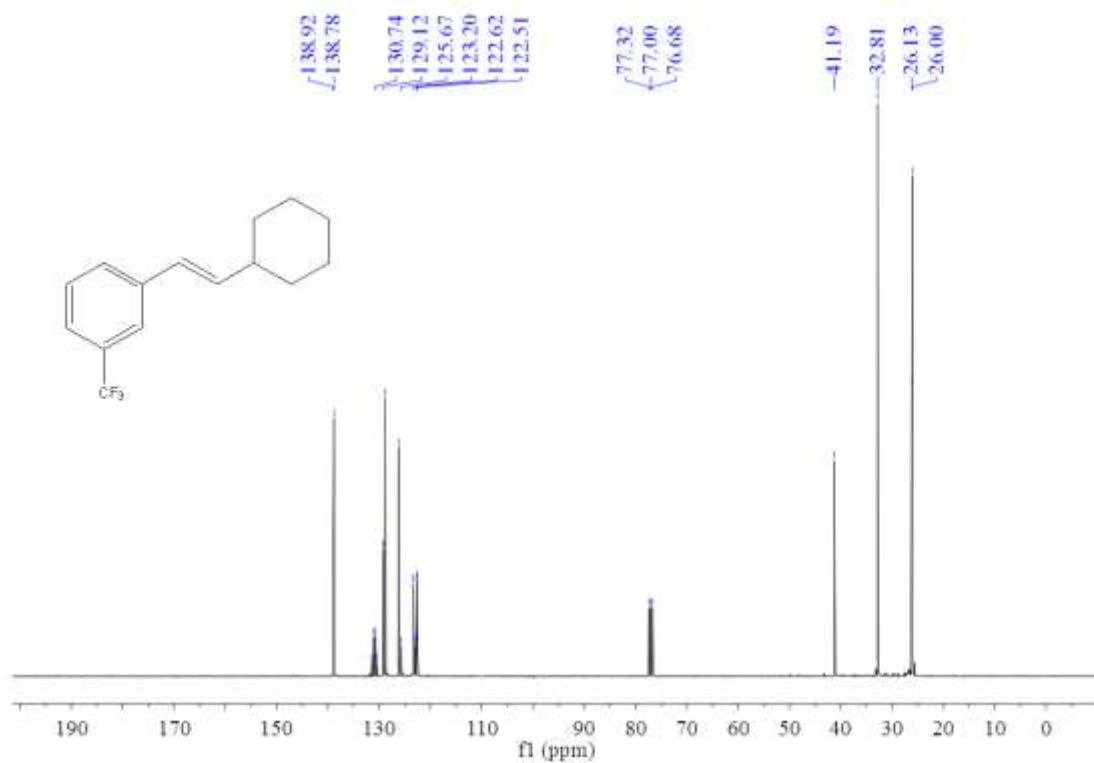

<sup>1</sup>H- and <sup>13</sup>C NMR of 3p

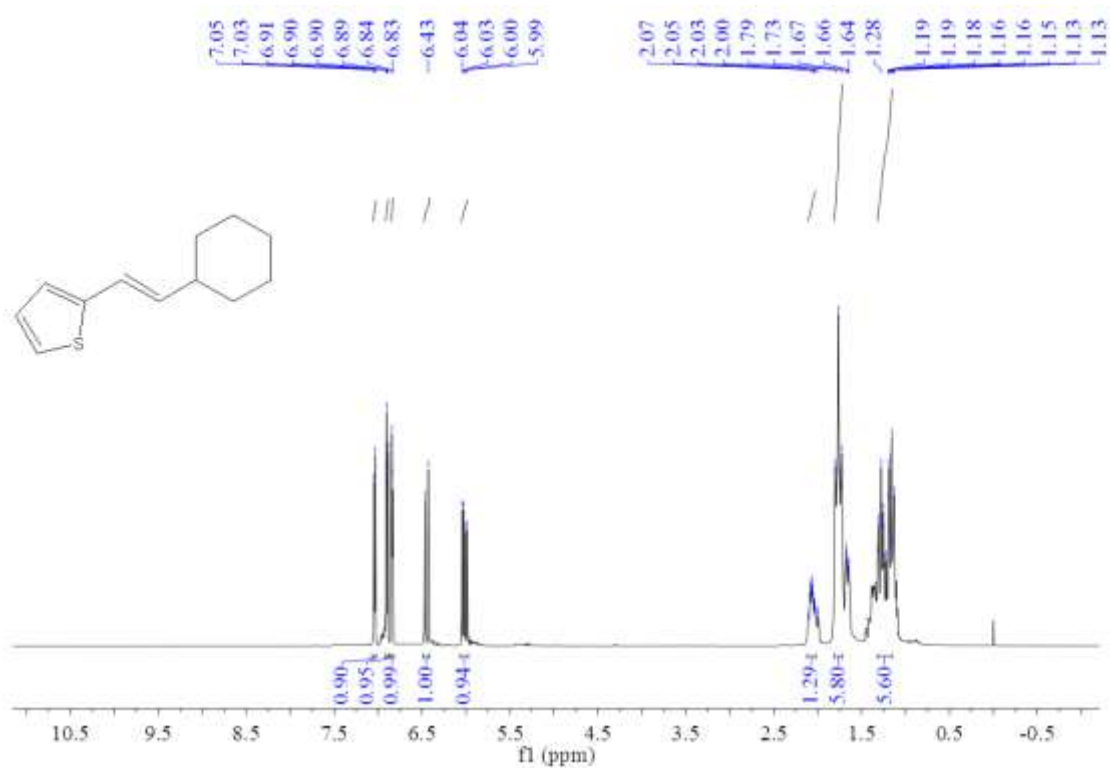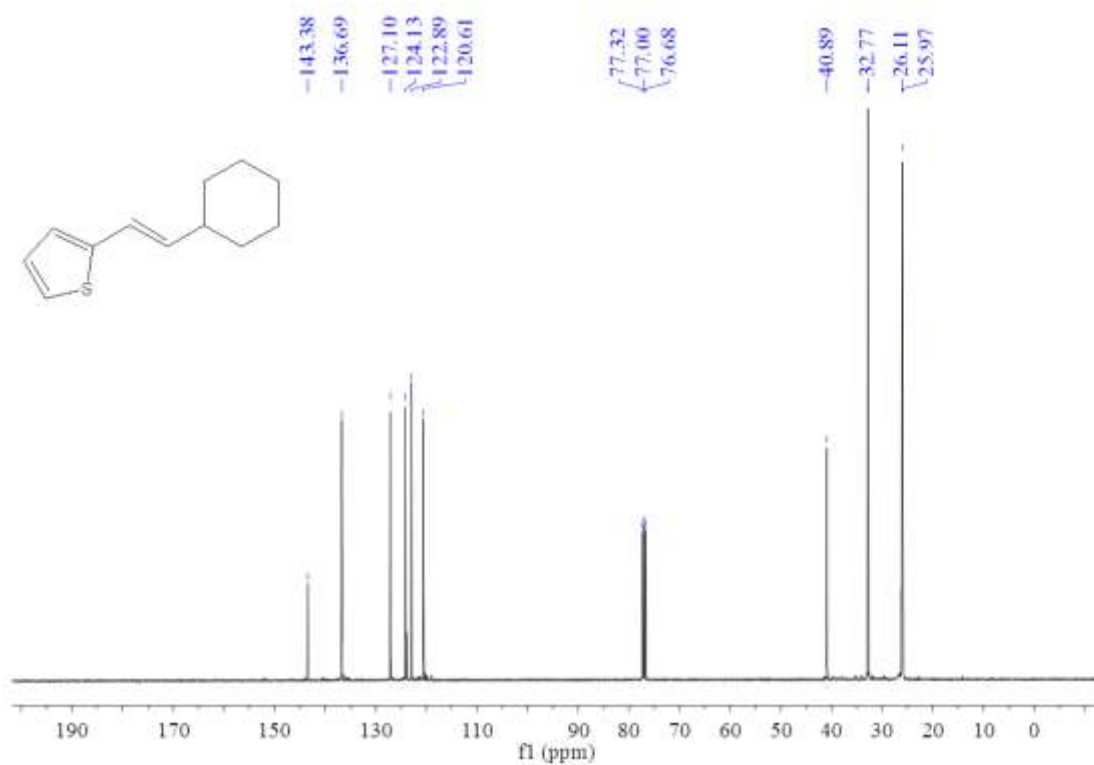



<sup>1</sup>H- and <sup>13</sup>C NMR of 4a

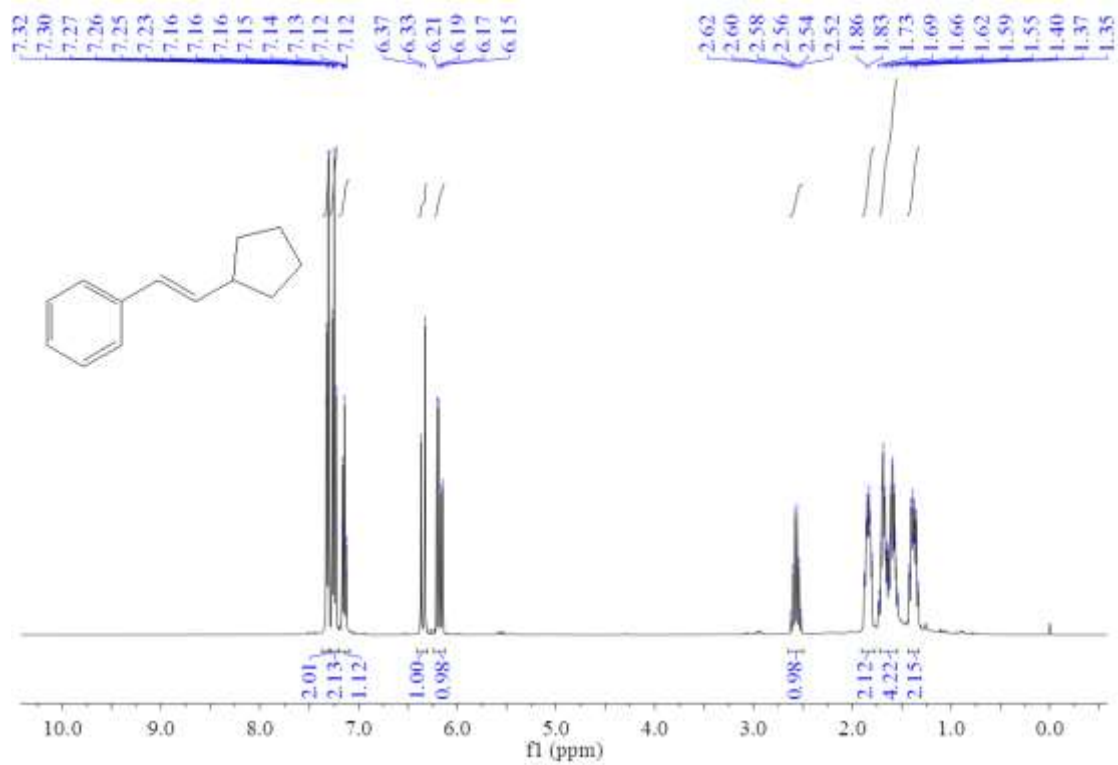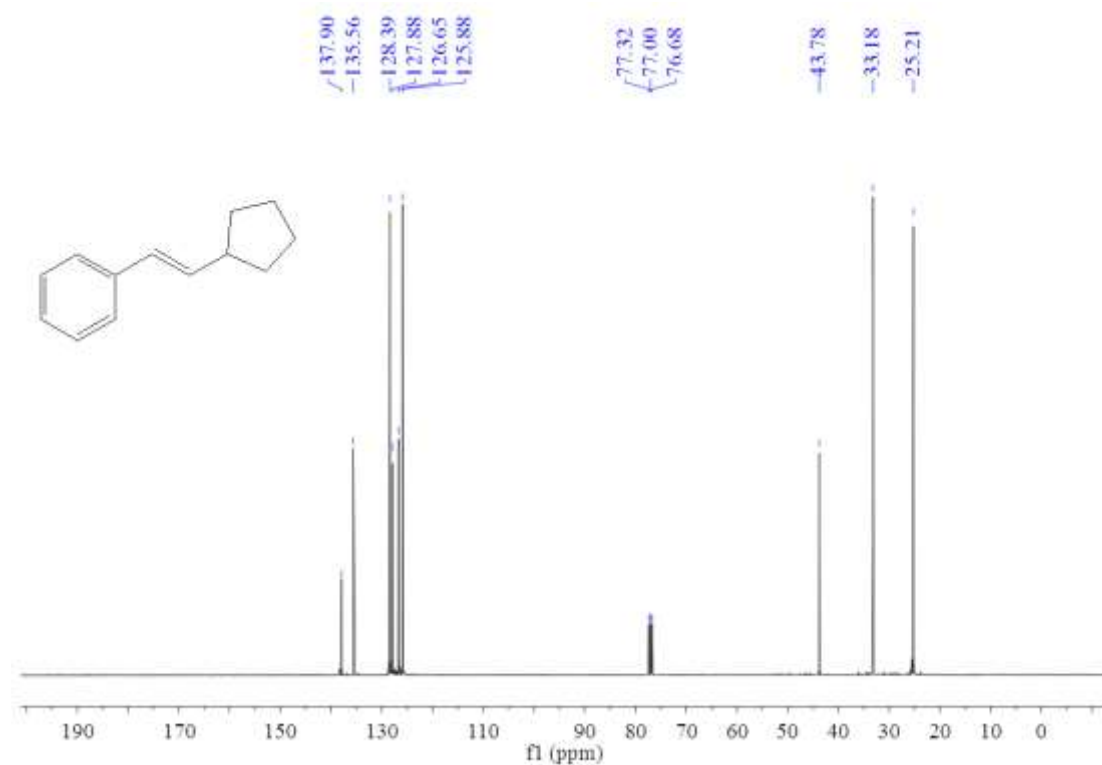

**<sup>1</sup>H- and <sup>13</sup>C NMR of 4b**

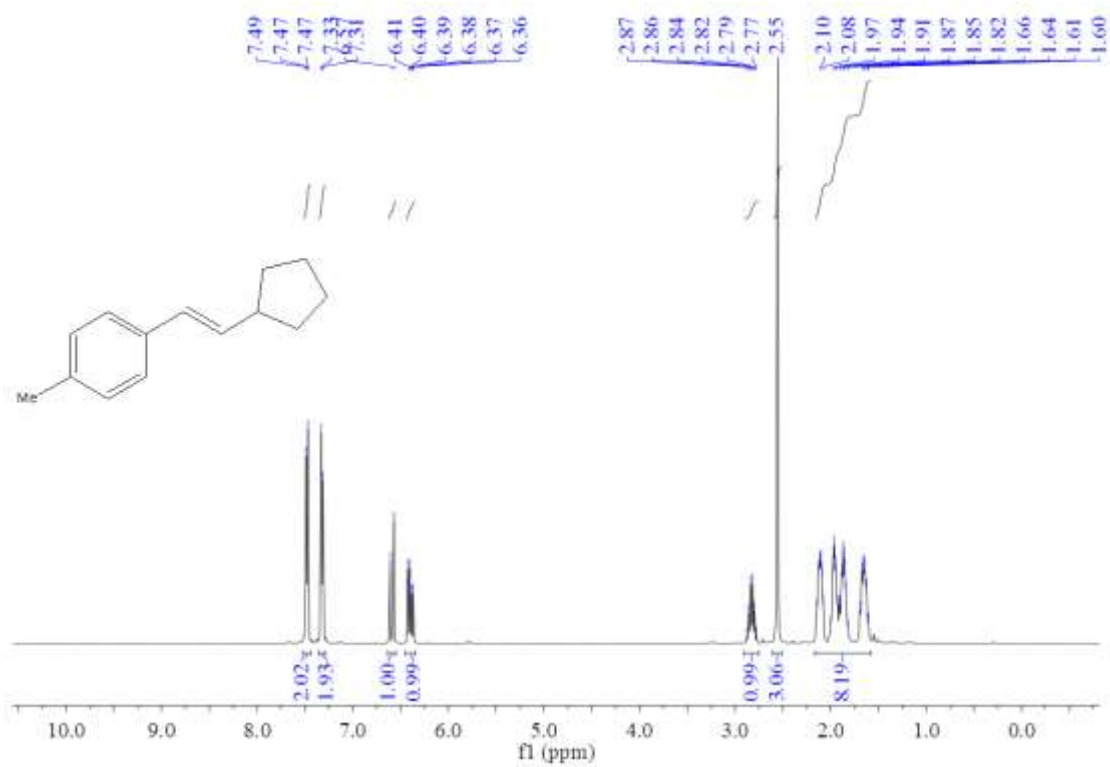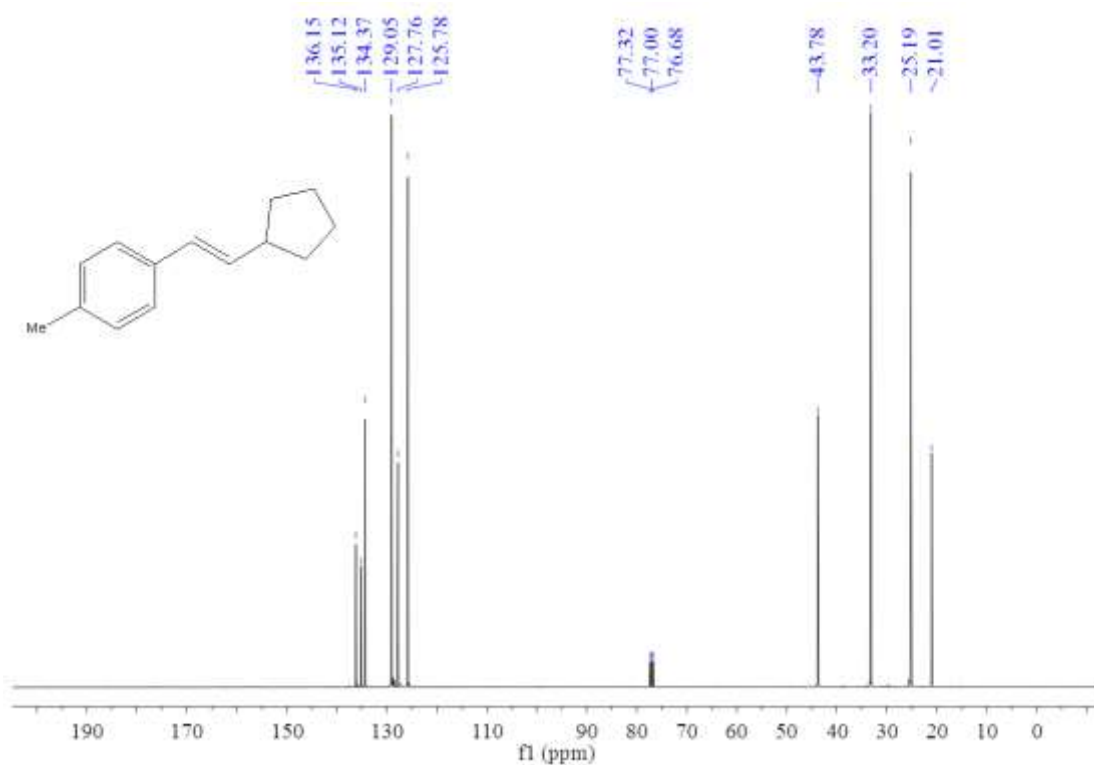

<sup>1</sup>H- and <sup>13</sup>C NMR of 4c

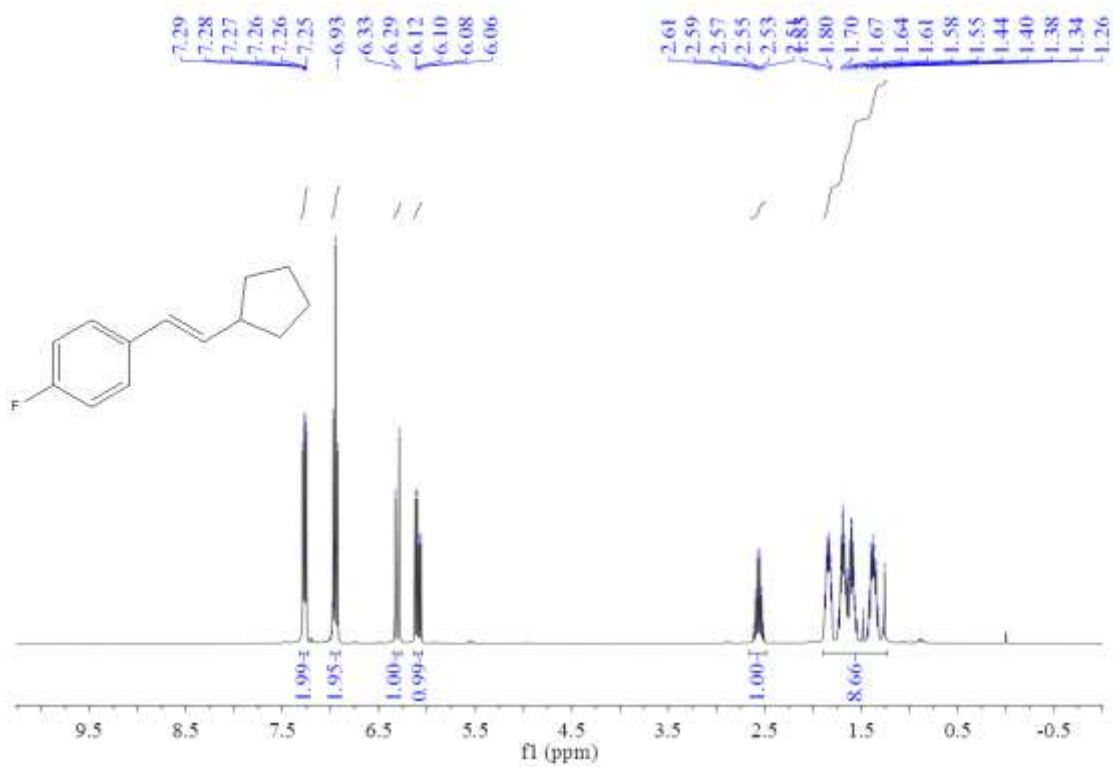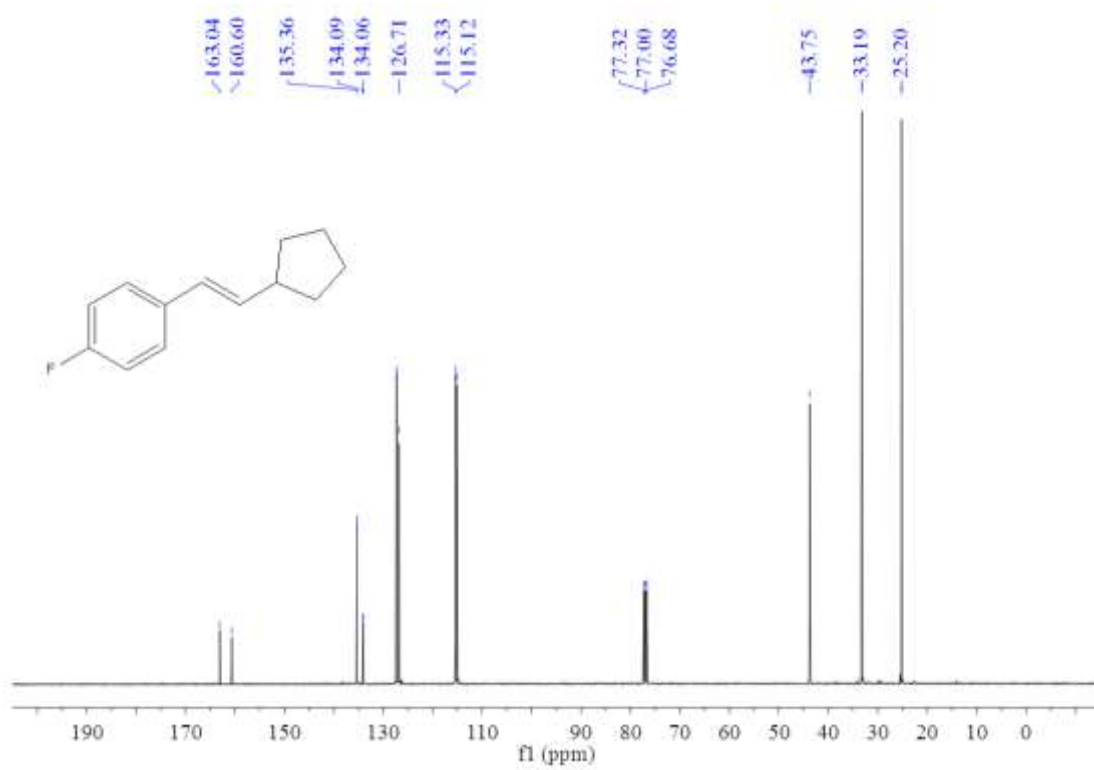

<sup>1</sup>H- and <sup>13</sup>C NMR of 4d

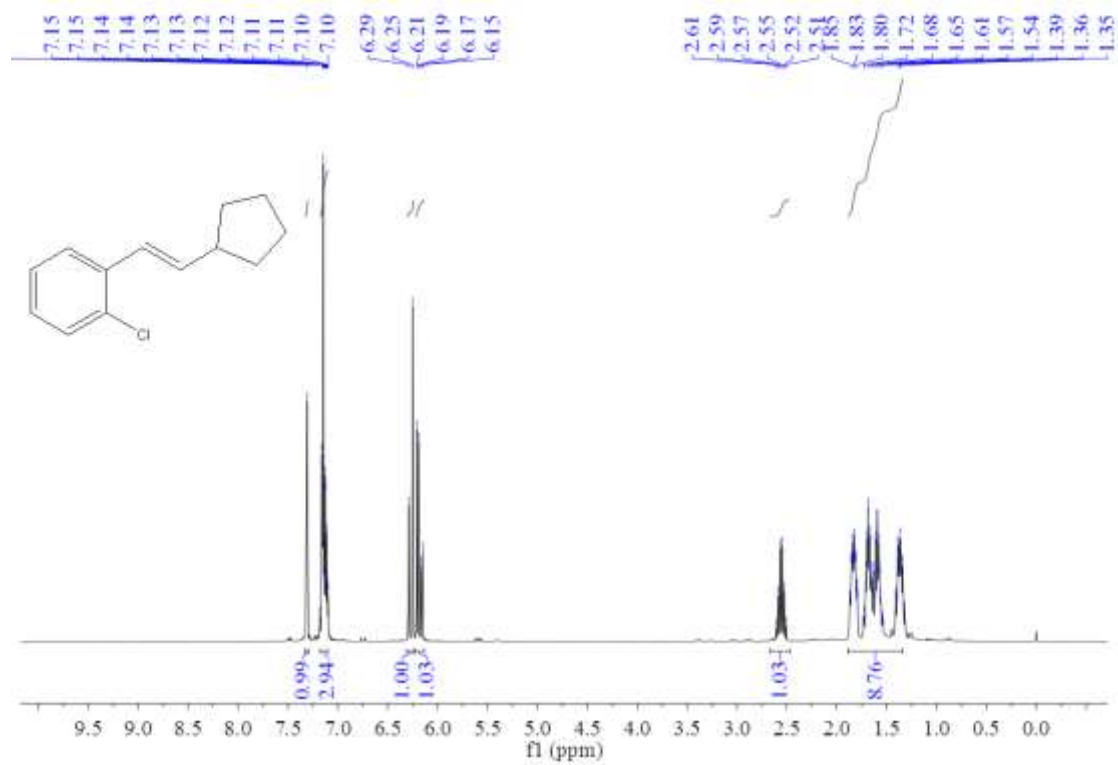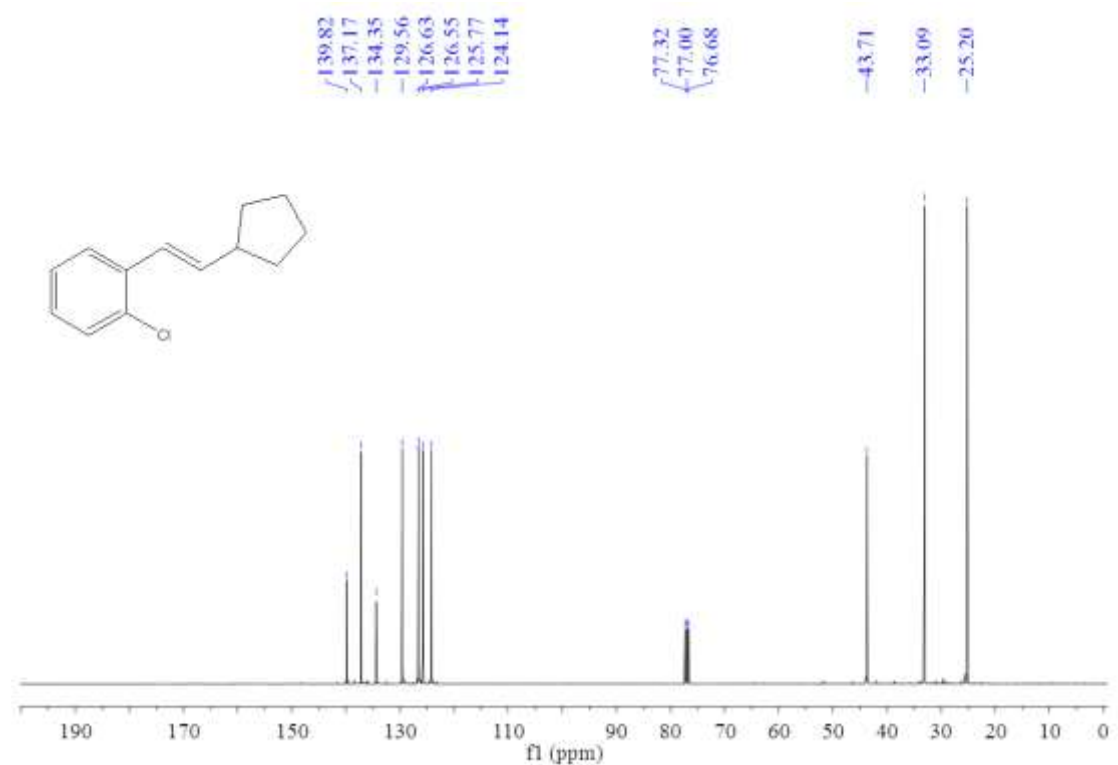

<sup>1</sup>H- and <sup>13</sup>C NMR of 4e

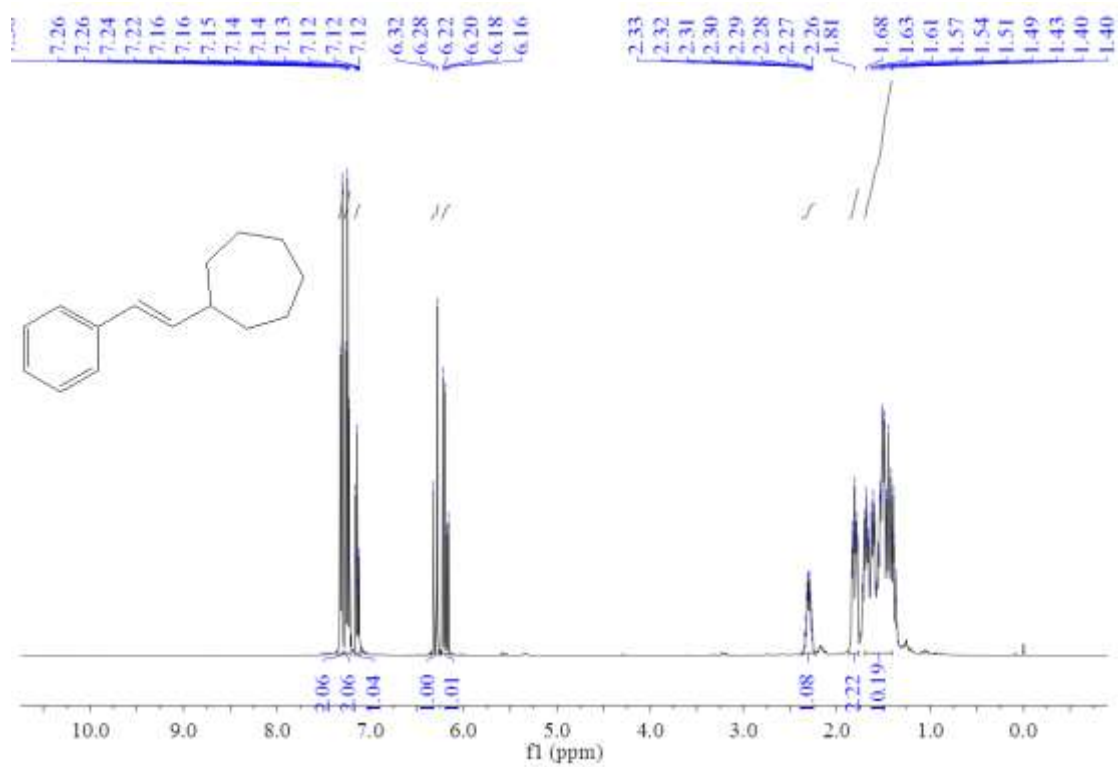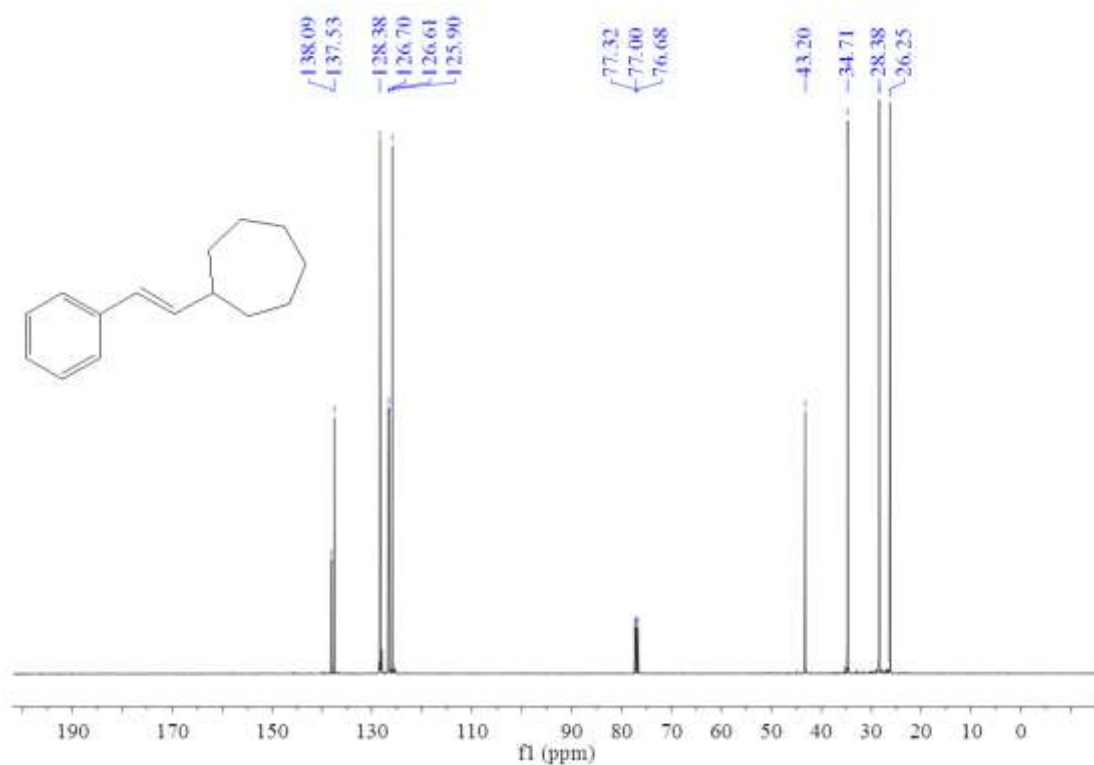

<sup>1</sup>H- and <sup>13</sup>C NMR of 4f

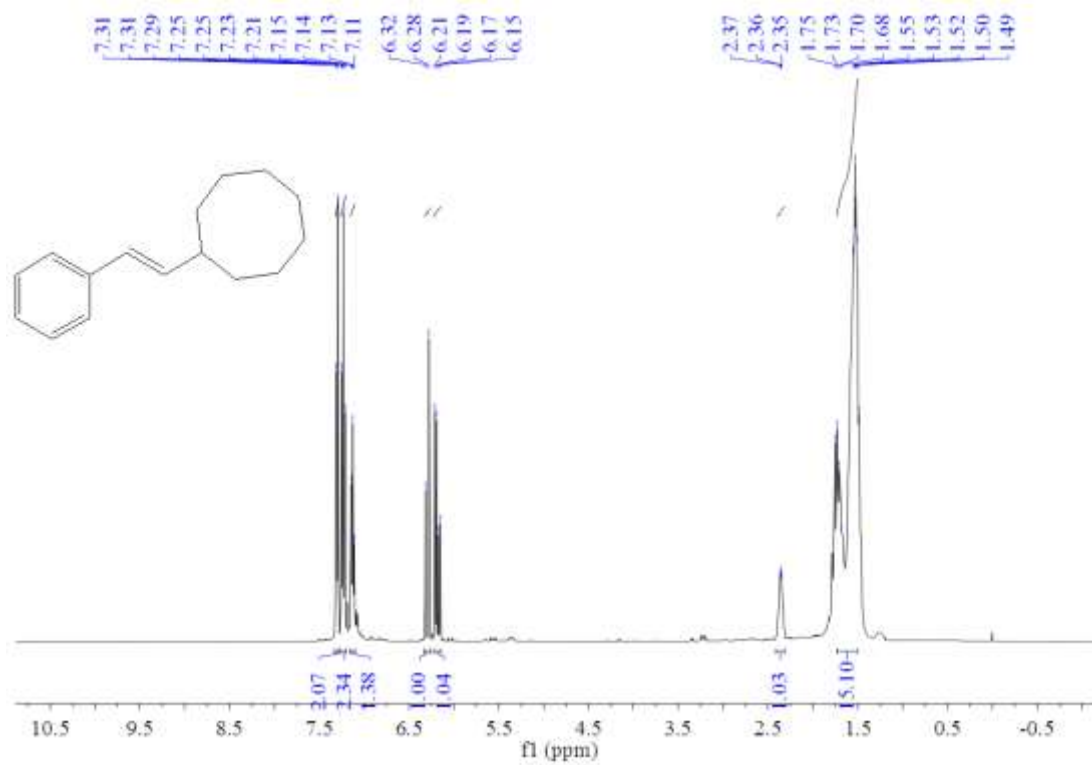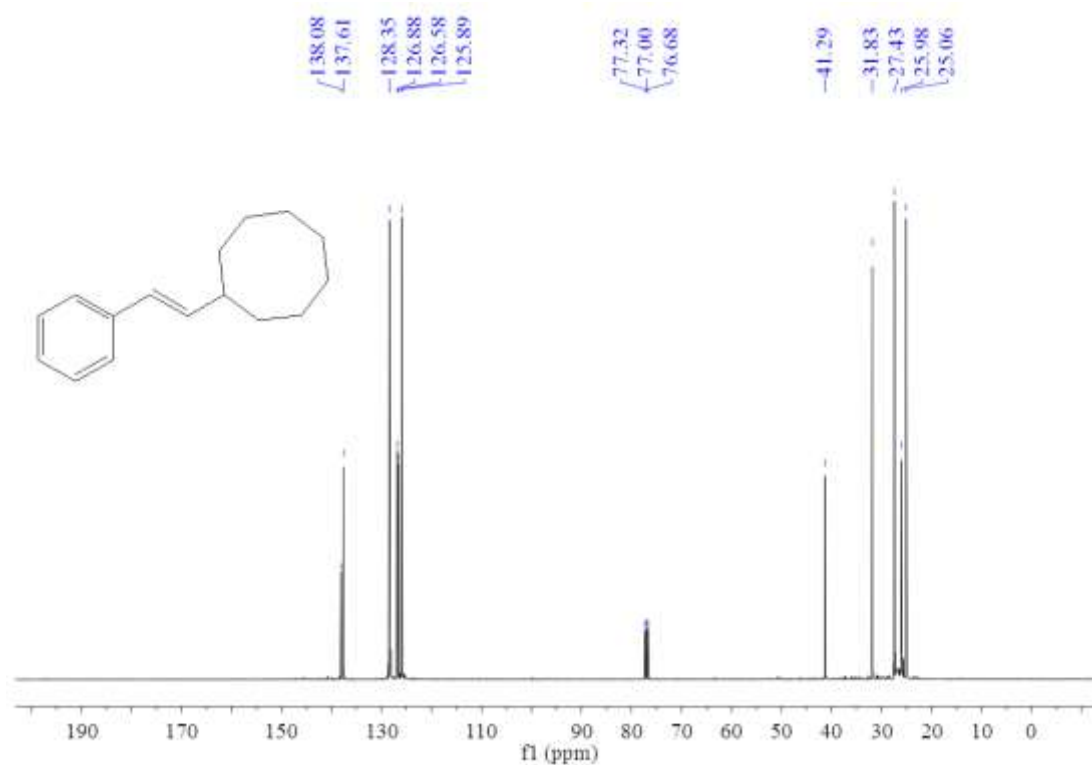

#### 4. References

1. Jang, Y.-J.; Shih, Y.-K.; Liu, J.-Y.; Kuo, W.-Y.; Yao, C.-F. *Chem. Eur. J.* **2003**, *9*, 2123-2128.
2. Ikeda, Y.; Nakamura, T.; Yorimitsu, H.; Oshima, K., *J. Am. Chem. Soc.* **2002**, *124*, 6514-6515.
3. Yao, Q.; Kinney, E. P.; Yang, Z., *J. Org. Chem.* **2003**, *68*, 7528-7531.
4. Loeffler, L. J. and Delorefice, S. B., *J. Pharm. Sci.* **1975**, *64*, 1170-1173.
5. Ishikawa, T.; Nonaka, S.; Hirao, T., *Chem. Commun.* **1998**, 1209-1210.
